# Supplementary material for: Molecular protection of fatty acid methyl esters within a supramolecular capsule
Source: Royal Society of Chemistry journal article supplement (doi:10.1039/c9cc06501f), 2019-01-01
Supplement: c9cc06501f1.pdf [file c9cc06501f1.pdf]

## Electronic Supporting Information

# Molecular protection of fatty acid methyl esters within a supramolecular nano-capsule

Kaiya Wang,<sup>1</sup> Jacobs Jordan,<sup>2</sup>  Bruce C. Gibb<sup>2\*</sup> 

<sup>1</sup>College Of Material Science & Technology, Nanjing University of Aeronautics and Astronautics,

*Nanjing 211100, China*

<sup>2</sup>Department of Chemistry, Tulane University, New Orleans, LA, 70118

## Table of Contents

|                                                                                                               |     |
|---------------------------------------------------------------------------------------------------------------|-----|
| 1. Materials and instrumentation                                                                              | S3  |
| 2. $^1\text{H}$ NMR analysis of the hydrolysis of free esters <b>3-12</b>                                     | S5  |
| 3. $^1\text{H}$ NMR analysis of the hydrolysis of esters <b>2-12</b> encapsulated within <b>1<sub>2</sub></b> | S15 |
| 4. Kinetic data for the hydrolysis of free and encapsulated esters <b>3-12</b>                                | S26 |
| 5. Competition experiments                                                                                    | S38 |
| 6. Mechanistic studies of the hydrolysis of encapsulated esters using $\text{H}_2^{18}\text{O}$               | S40 |
| 7. References                                                                                                 | S44 |

## 1 Materials and Instrumentation

Host **1** was synthesized following previously reported procedures.<sup>1</sup> All NMR spectra were recorded on a Bruker 500 MHz spectrometer at 25 °C unless otherwise stated. Spectral processing was carried out using Mnova software (Mestrelab Research S.L). All reagents and guests **2** and **5-10** (Figure S1) were purchased from Aldrich and were used without purification. Guests **3**, **4**, **11** and **12** were synthesized as previously reported.<sup>2</sup> For reference, Figure S2 shows the <sup>1</sup>H NMR spectrum of a 1 mM solution of free host **1** in 10 mM NaOH/D<sub>2</sub>O. <sup>18</sup>O-labeled water (purity 95%, Marshall Isotope Inc.) was a gift from Prof. Mike Watkinson (Keel University, UK. Thanks Mike!). ESI-MS spectra were collected using a Bruker microTOF mass spectrometer.

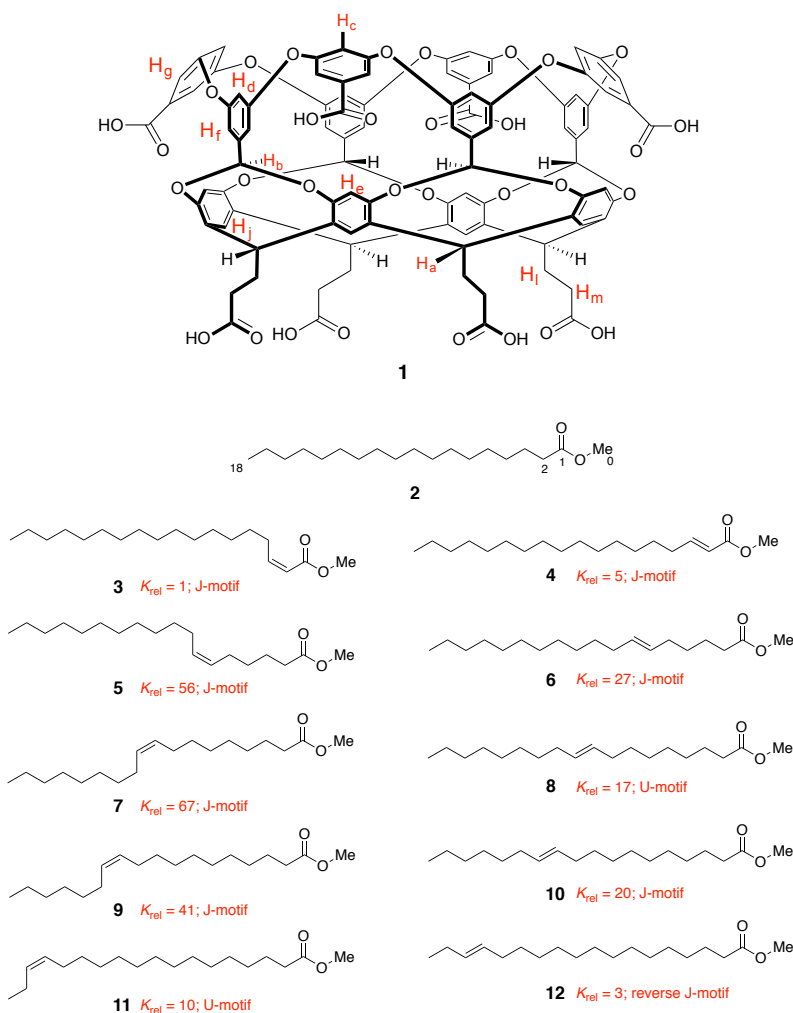

Figure S1: Chemical structures of host **1** and guests **2-12**.

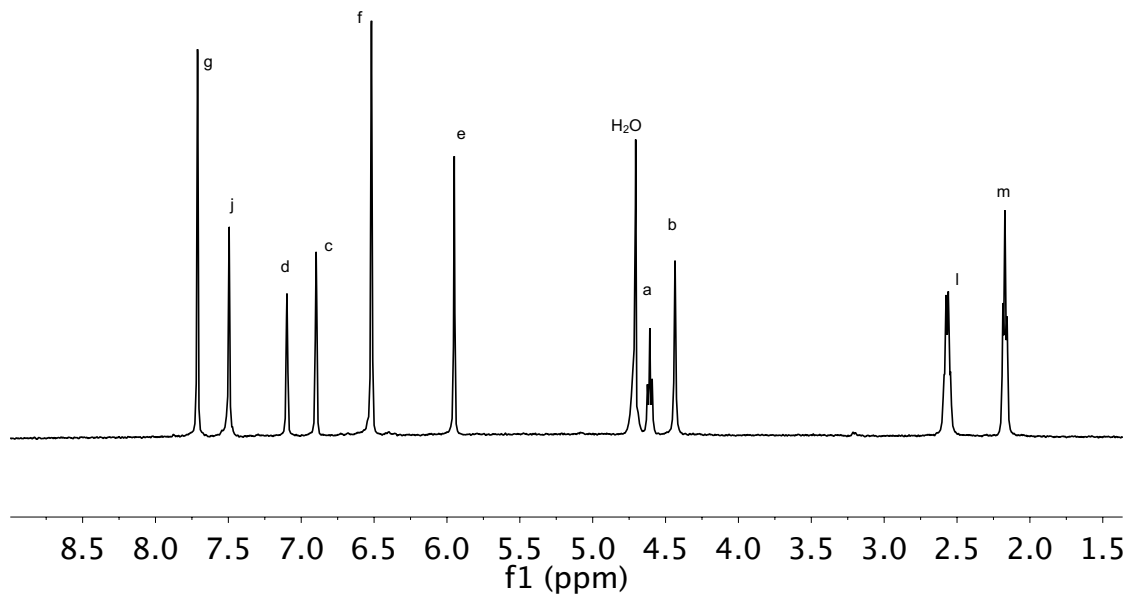

**Figure S2:** <sup>1</sup>H NMR spectrum of 1 mM **1** in 10 mM NaOH/D<sub>2</sub>O (See Figure S1 for peak assignments).

## 2 $^1\text{H}$ NMR analysis of the hydrolysis of free esters 3-12

For the hydrolyses of the free esters **3-12** a 40:60 acetone- $d_6$ : $\text{D}_2\text{O}$  solution was required to ensure homogeneity ( $[\text{ester}] = 0.5 \text{ mM}$ ,  $[\text{NaOH}] = 150 \text{ mM}$ ,  $T = 25 \text{ }^\circ\text{C}$ ). Hydrolysis was monitored by  $^1\text{H}$  NMR spectroscopy by integration of the  $-\text{OCH}_3$  group of the ester ( $\delta \approx 3.63 \text{ ppm}$ ) and the corresponding methoxy signal from the methanol side-product ( $\delta \approx 3.34 \text{ ppm}$ ). Each hydrolysis was carried out in duplicate, with representative NMR spectra for the hydrolysis of free esters **3-12** shown in Figures S3-S12.

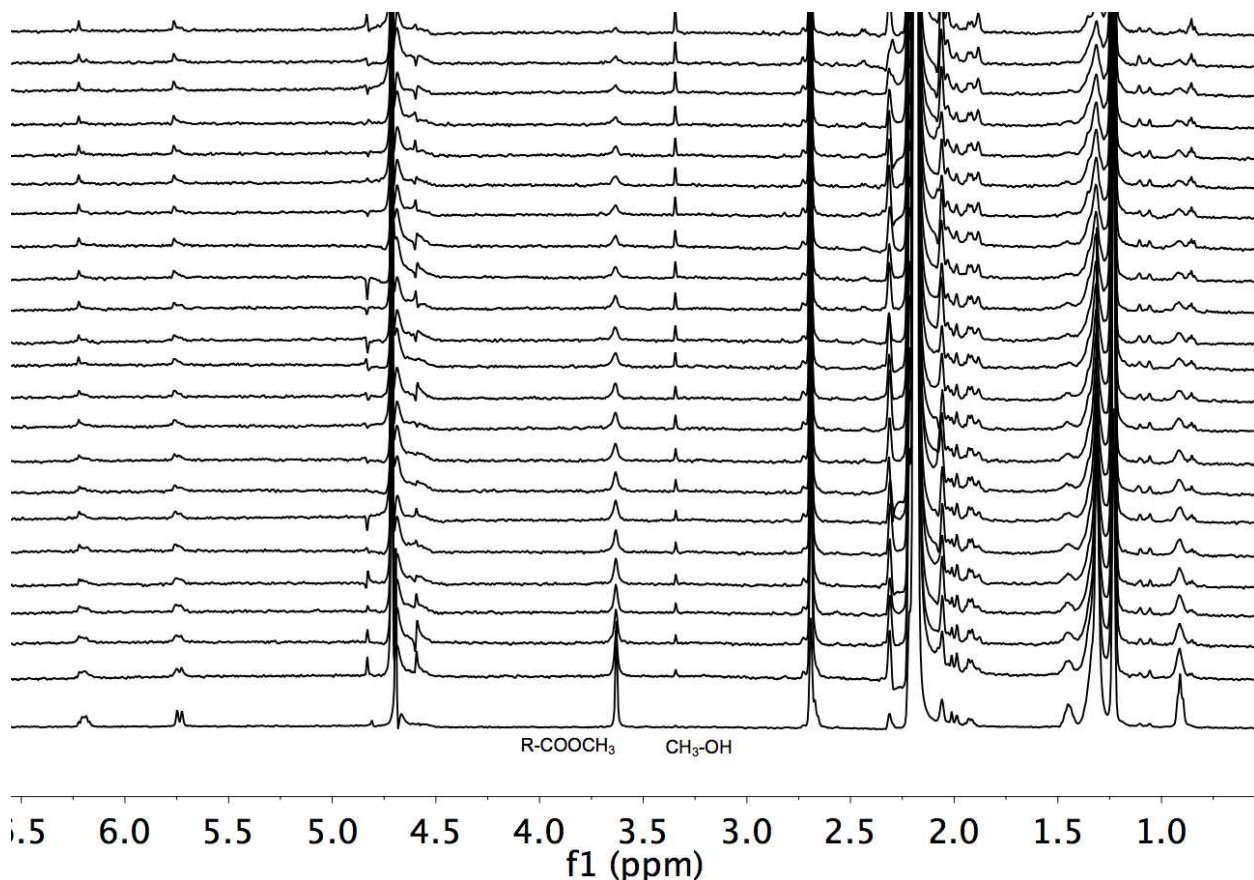

**Figure S3:** Stacked  $^1\text{H}$  NMR spectra for the hydrolysis of free ester **3** at 40 min. intervals (40:60 acetone- $d_6$ :  $\text{D}_2\text{O}$ , 25  $^\circ\text{C}$ ,  $[\text{Ester } 3] = 0.5 \text{ mM}$ ,  $[\text{NaOH}] = 150 \text{ mM}$ ).

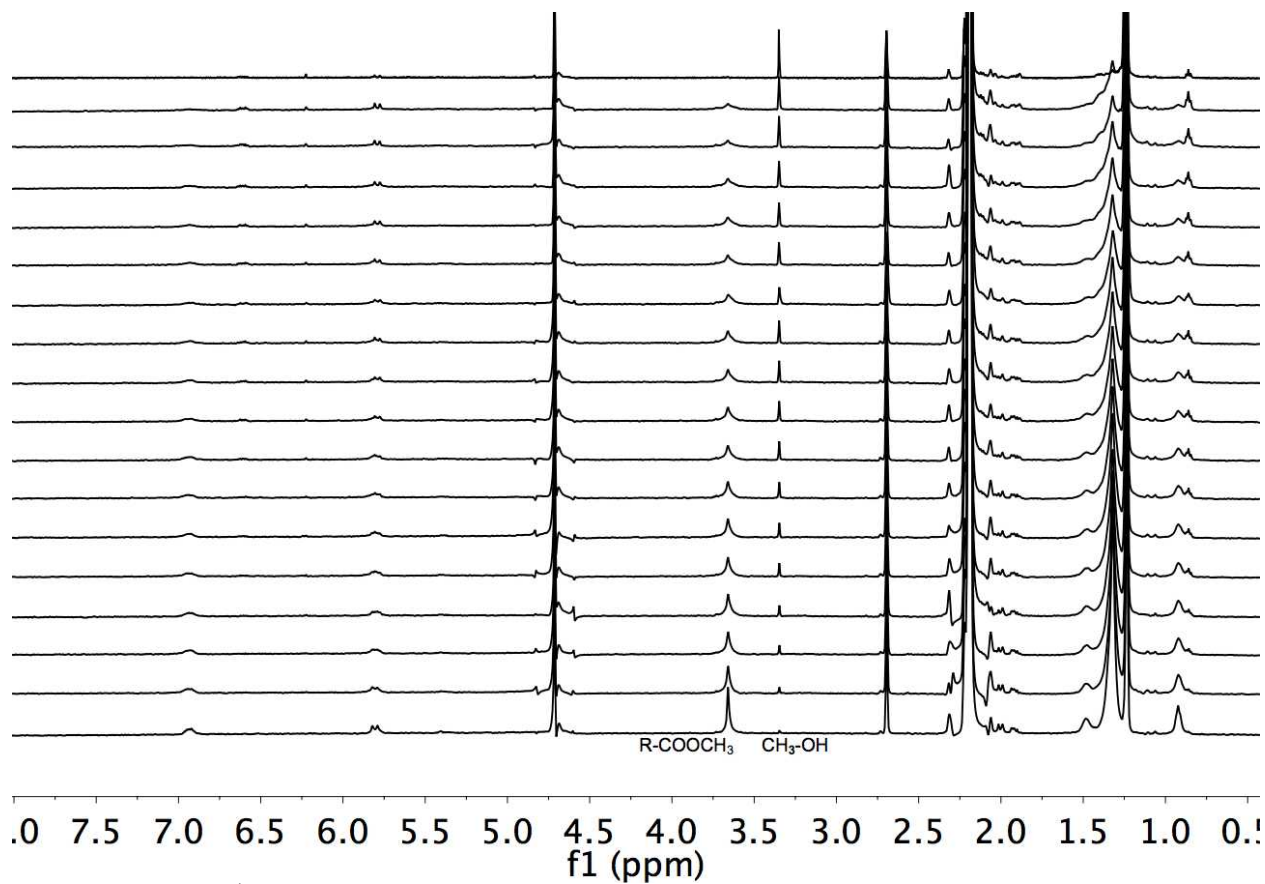

**Figure S4:** Stacked <sup>1</sup>H NMR spectra for the hydrolysis of free ester **4** at 40 min. intervals (40:60 acetone-*d*<sub>6</sub>: D<sub>2</sub>O, 25 °C, [Ester **4**] = 0.5 mM, [NaOH] = 150 mM).

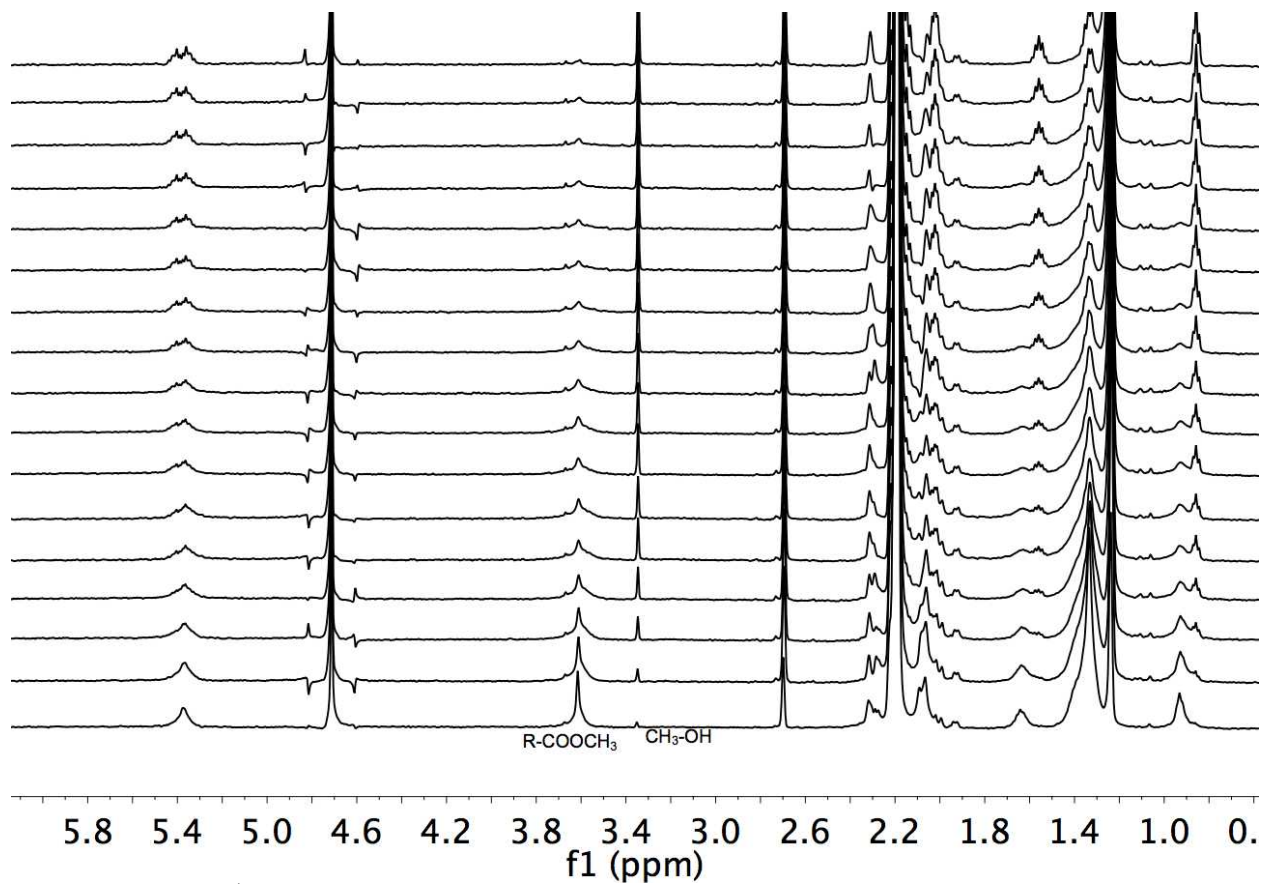

**Figure S5:** Stacked <sup>1</sup>H NMR spectra for the hydrolysis of free ester **5** at 10 min. intervals (40:60 acetone-*d*<sub>6</sub>: D<sub>2</sub>O, 25 °C, [Ester **5**] = 0.5 mM, [NaOH] = 150 mM).

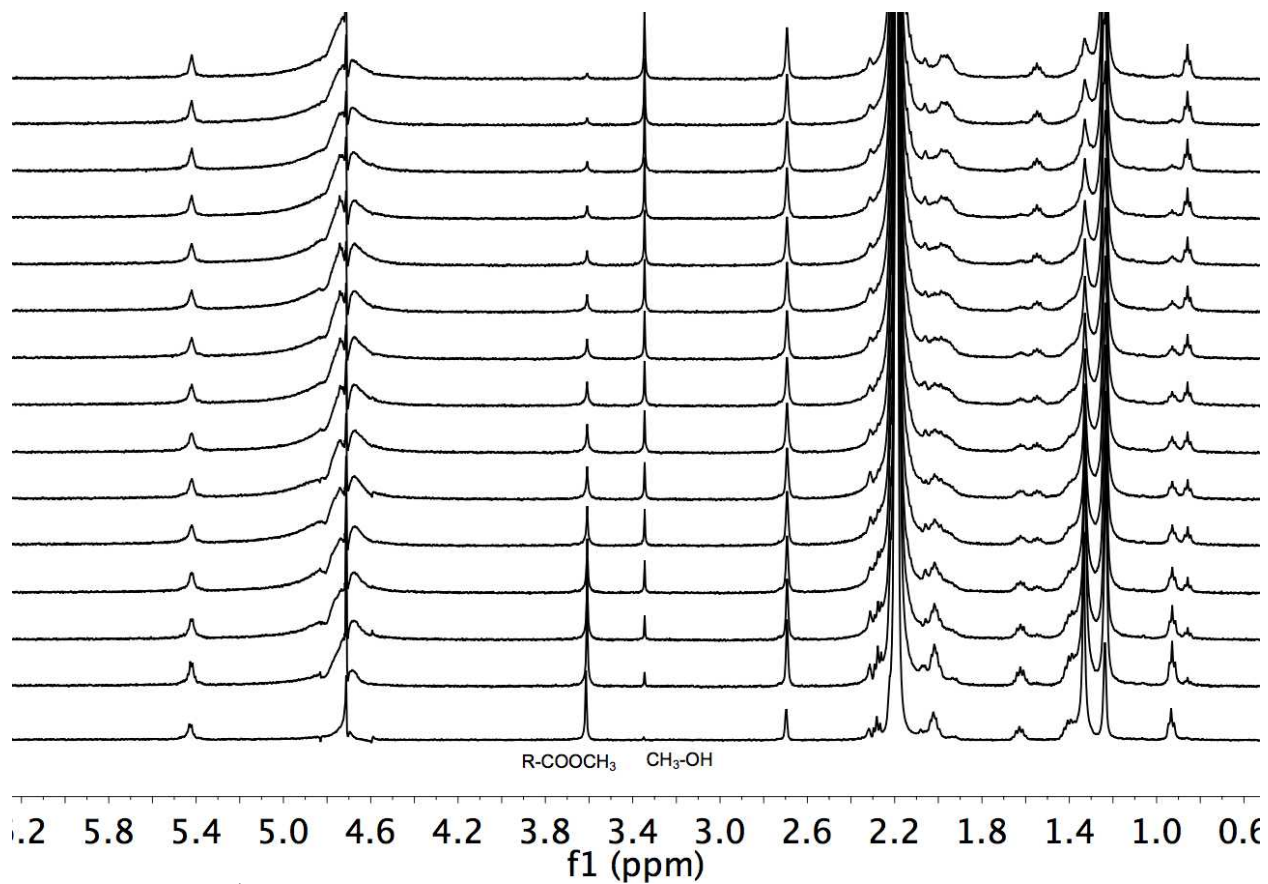

**Figure S6:** Stacked <sup>1</sup>H NMR spectra for the hydrolysis of free ester **6** at 10 min. intervals (40:60 acetone-*d*<sub>6</sub>: D<sub>2</sub>O, 25 °C, [Ester **6**] = 0.5 mM, [NaOH] = 150 mM).



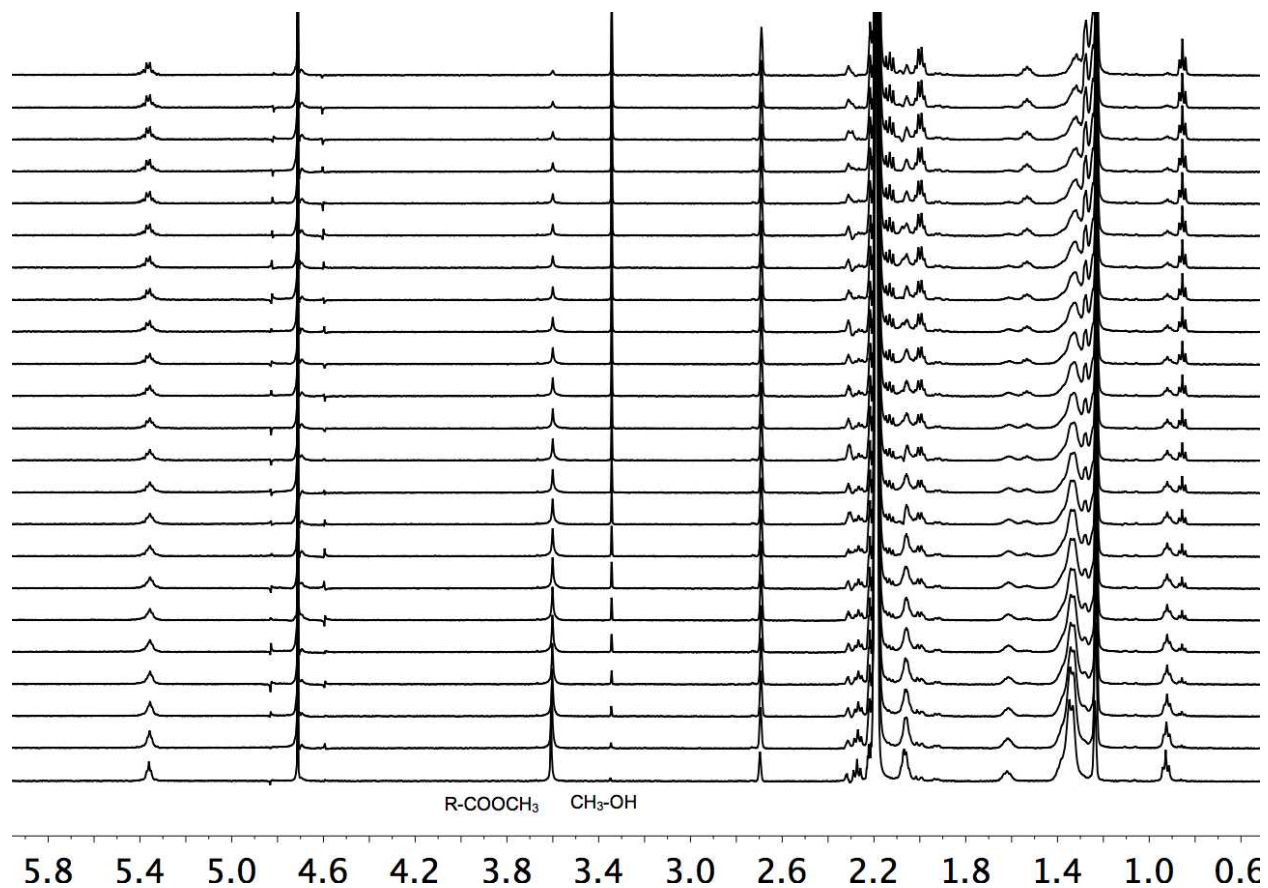

**Figure S7:** Stacked <sup>1</sup>H NMR spectra for the hydrolysis of free ester 7 at 5 min. intervals (40:60 acetone-*d*<sub>6</sub>: D<sub>2</sub>O, 25 °C, [Ester 7] = 0.5 mM, [NaOH] = 150 mM).

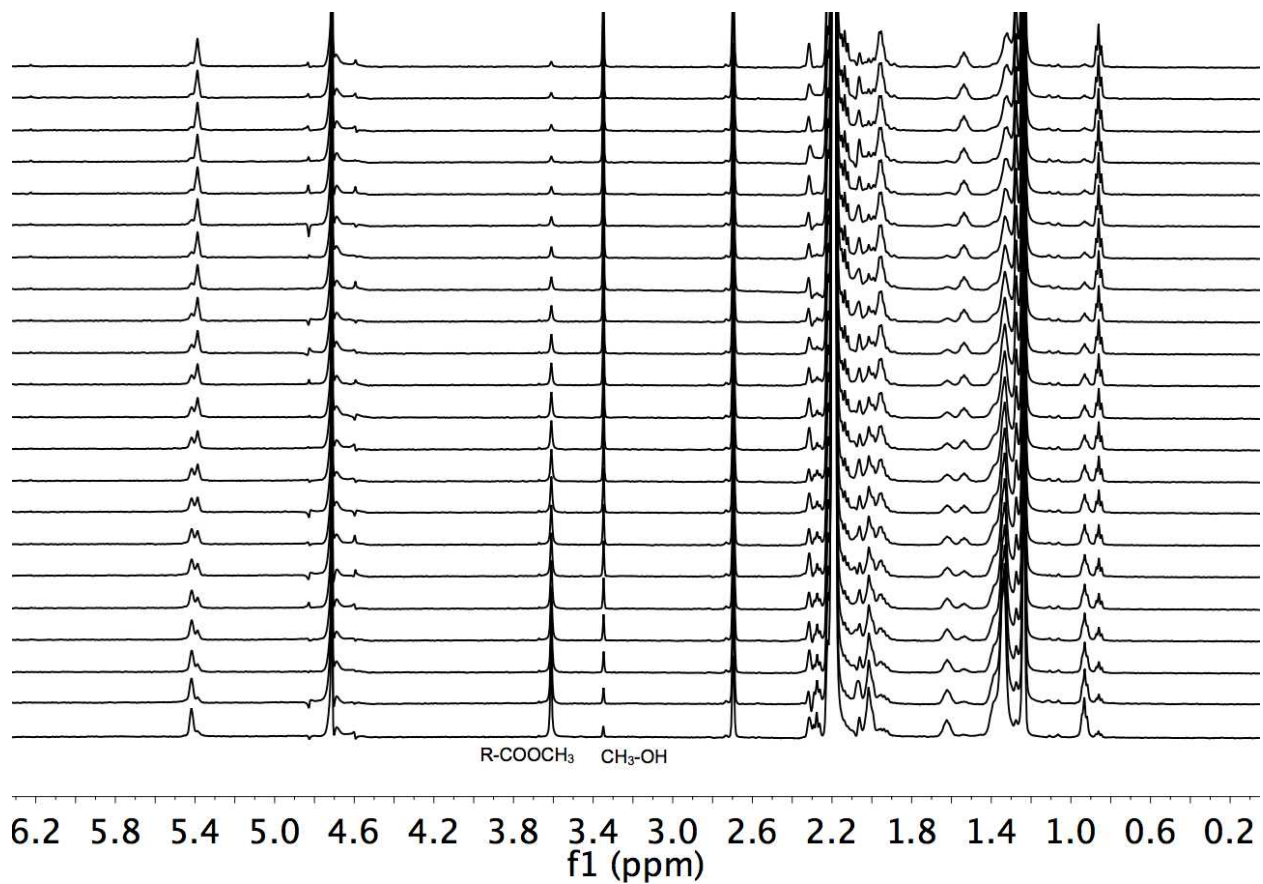

**Figure S8:** Stacked <sup>1</sup>H NMR spectra for the hydrolysis of free ester **8** at 5 min. intervals (40:60 acetone-*d*<sub>6</sub>: D<sub>2</sub>O, 25 °C, [Ester **8**] = 0.5 mM, [NaOH] = 150 mM).

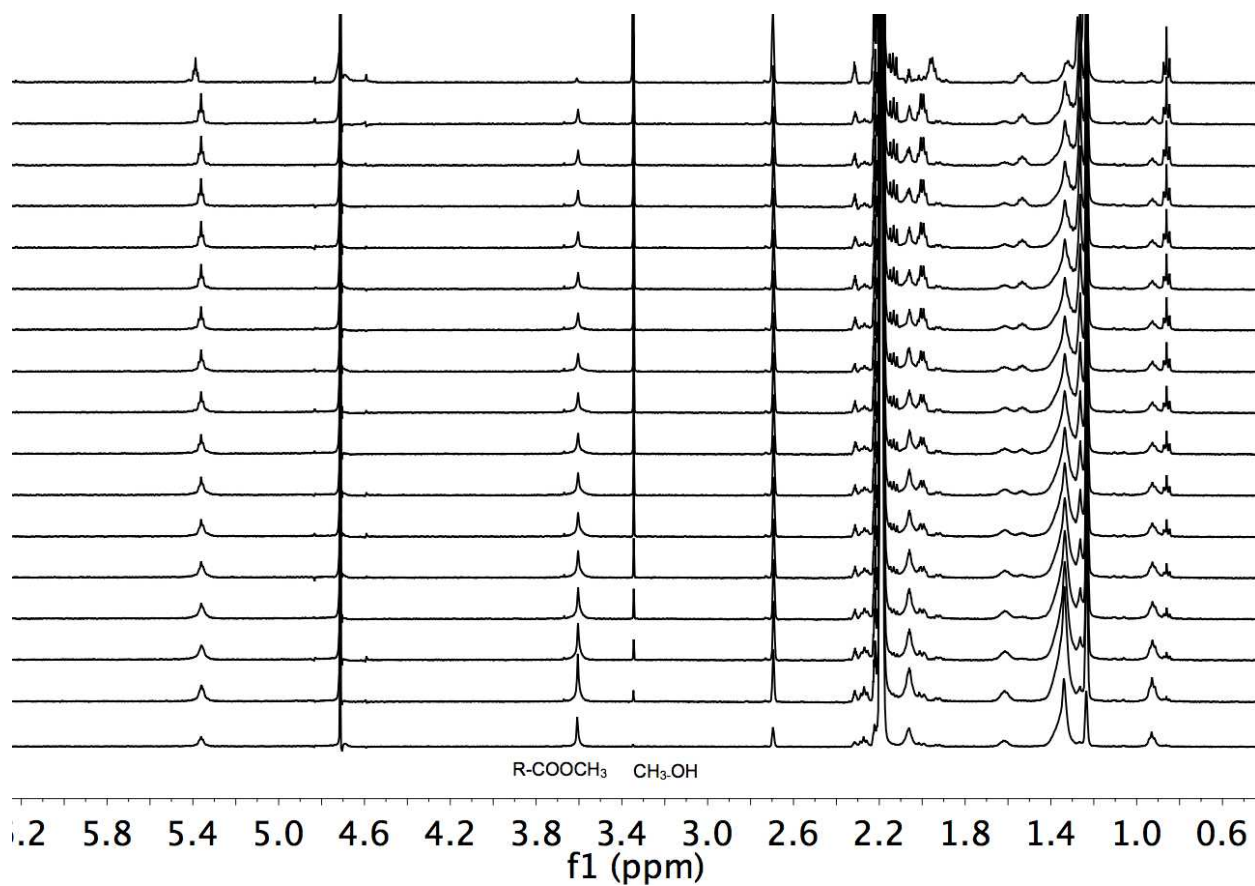

**Figure S9:** Stacked <sup>1</sup>H NMR spectra for the hydrolysis of free ester **9** at 10 min. intervals (40:60 acetone-*d*<sub>6</sub>: D<sub>2</sub>O, 25 °C, [Ester **9**] = 0.5 mM, [NaOH] = 150 mM).

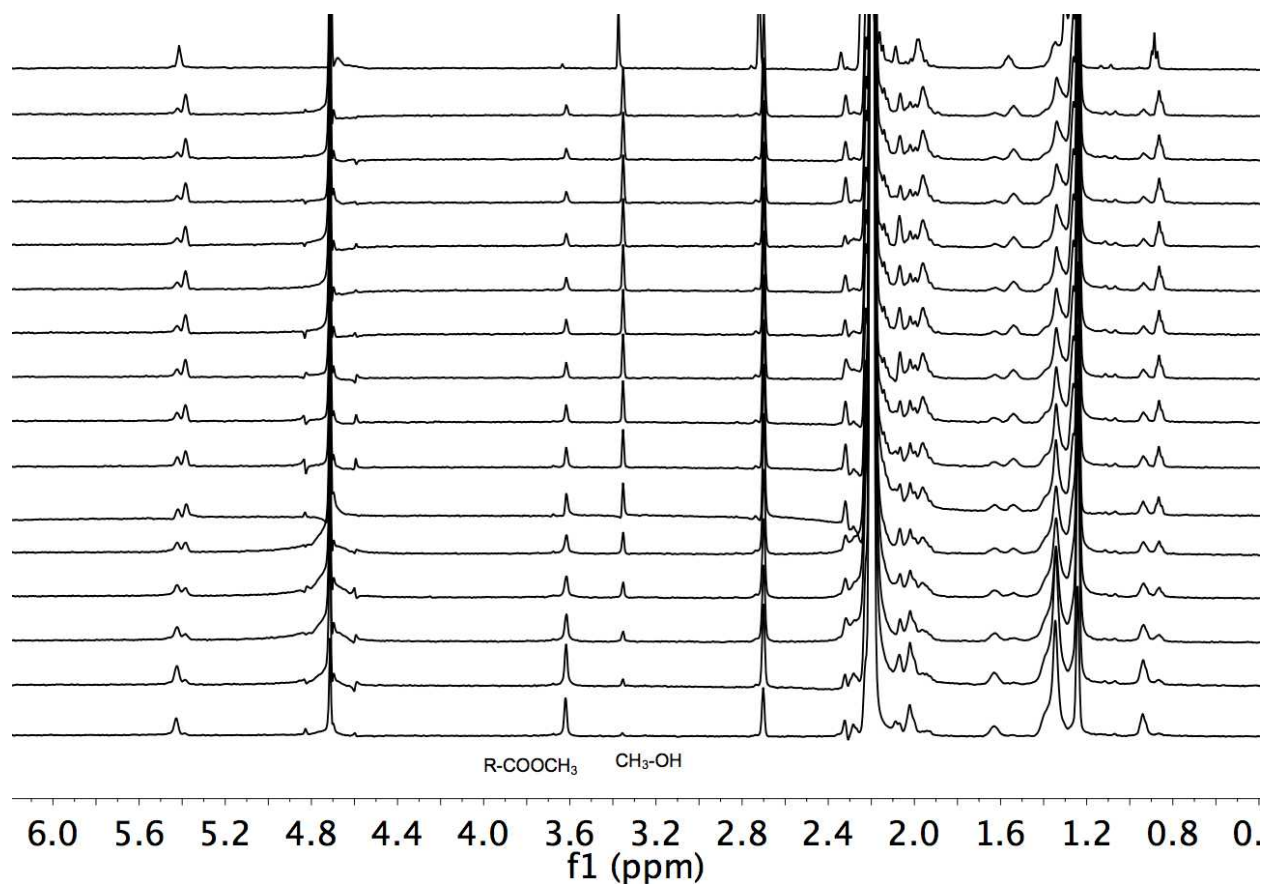

**Figure S10:** Stacked <sup>1</sup>H NMR spectra for the hydrolysis of free ester **10** at 10 min. intervals (40:60 acetone-*d*<sub>6</sub>: D<sub>2</sub>O, 25 °C, [Ester **10**] = 0.5 mM, [NaOH] =150 mM).

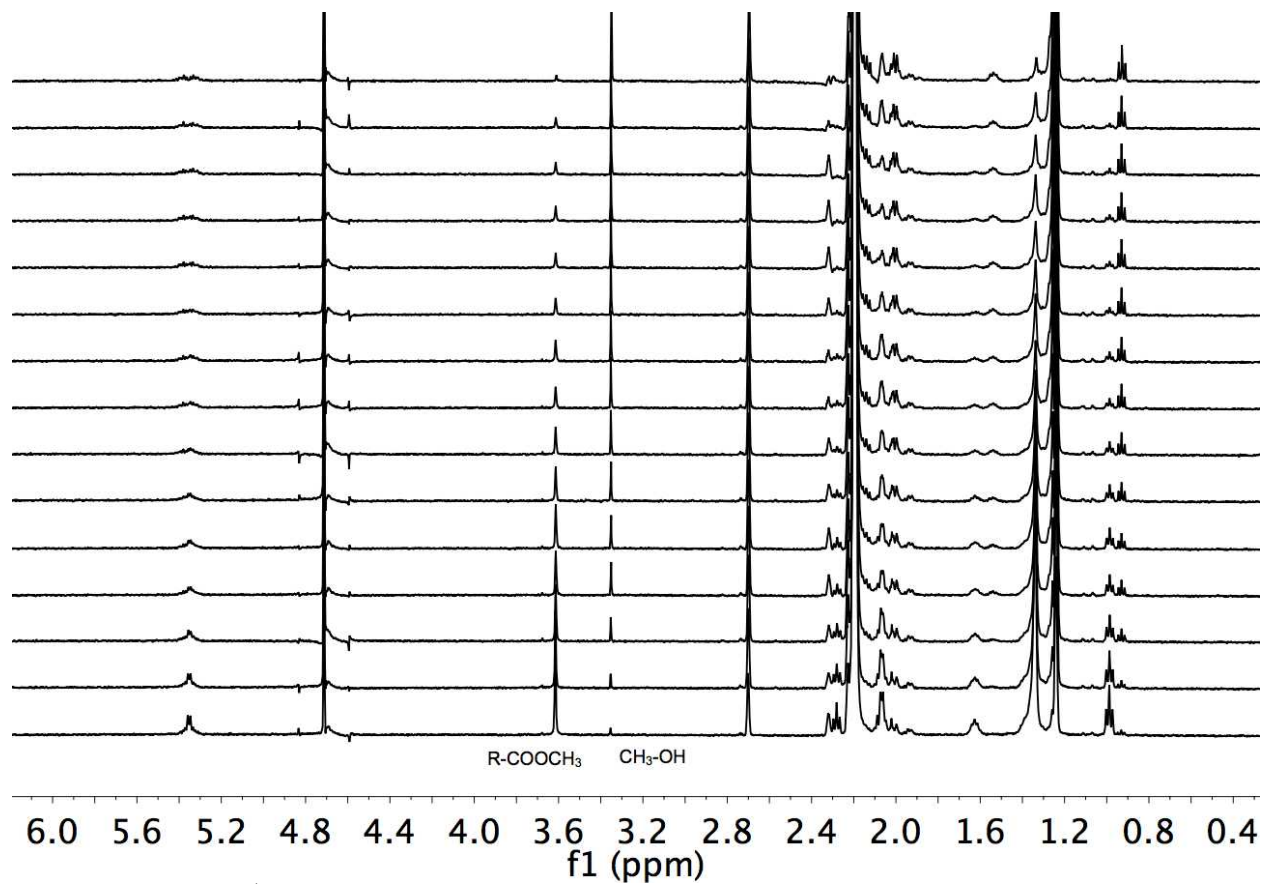

**Figure S11:** Stacked  $^1\text{H}$  NMR spectra for the hydrolysis of free ester **11** at 10 min. intervals (40:60 acetone- $d_6$ :  $\text{D}_2\text{O}$ , 25 °C, [Ester **11**] = 0.5 mM, [NaOH] = 150 mM).

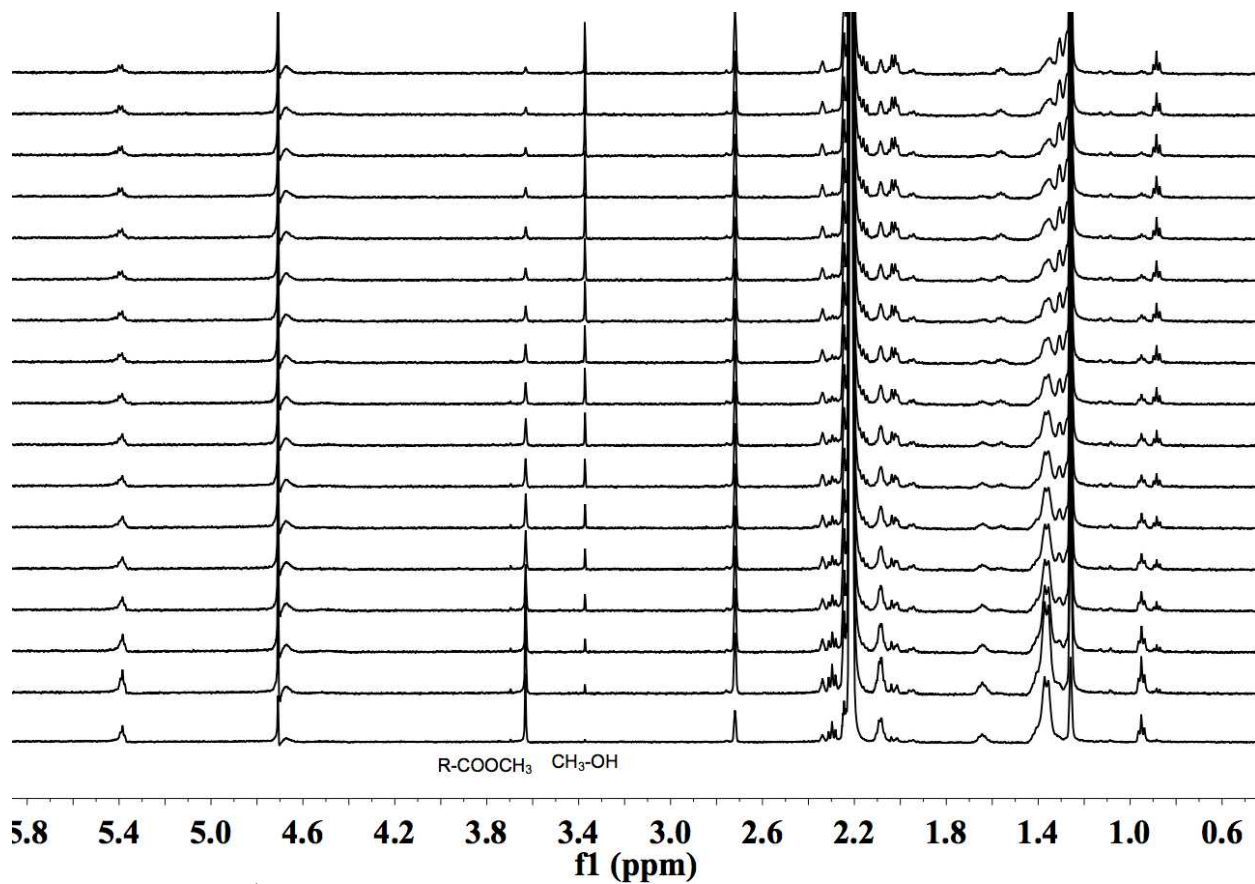

**Figure S12:** Stacked <sup>1</sup>H NMR spectra for the hydrolysis of free ester **12** at 10 min. intervals (40:60 acetone-*d*<sub>6</sub>: D<sub>2</sub>O, 25 °C, [Ester **12**] = 0.5 mM, [NaOH] = 150 mM).

### 3 $^1\text{H}$ NMR analysis of the hydrolysis of esters 2-12 encapsulated within $1_2$

The complexes were prepared in  $\text{D}_2\text{O}$  (ester = 0.5 mM, host = 1 mM,  $\text{NaOH}$  = 150 mM,  $T$  = 25  $^\circ\text{C}$ ) using the previously reported methods.<sup>3</sup> The hydrolysis of each encapsulated ester 2-12 was monitored by  $^1\text{H}$  NMR (Figures S13-23); in cases where the signal of the terminal  $-\text{CH}_3$  group of the ester and acid product were well-defined, integration gave the extent of hydrolysis as a function of time. If this was not possible to use these signals, integration of the host peaks 'm' or 'l' peak and the terminal  $-\text{CH}_3$  group of the acid were used instead.

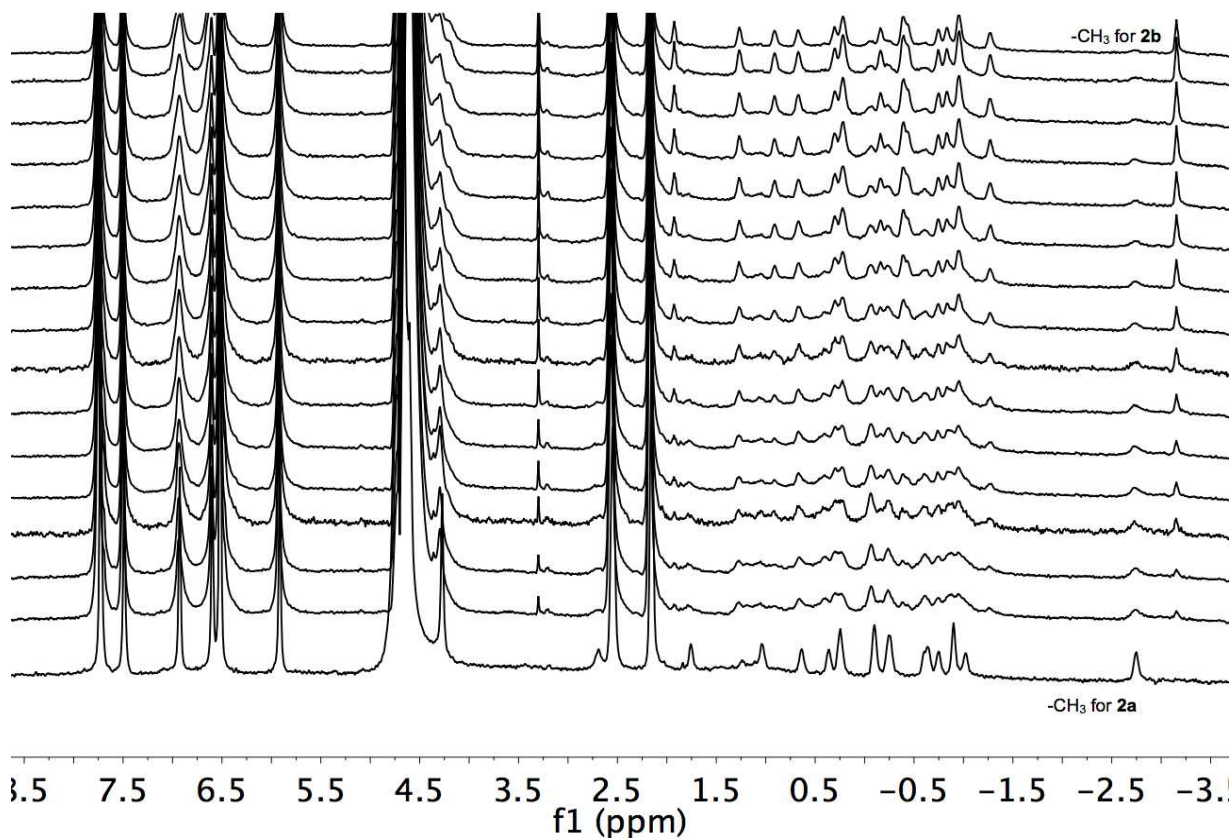

**Figure S13:** Stacked  $^1\text{H}$  NMR spectra for the hydrolysis of encapsulated ester 2 at 10 min. intervals ( $\text{D}_2\text{O}$ , 25  $^\circ\text{C}$ , [Ester 2] = 0.5 mM, [ $\text{NaOH}$ ] = 150 mM, [host] = 1 mM).

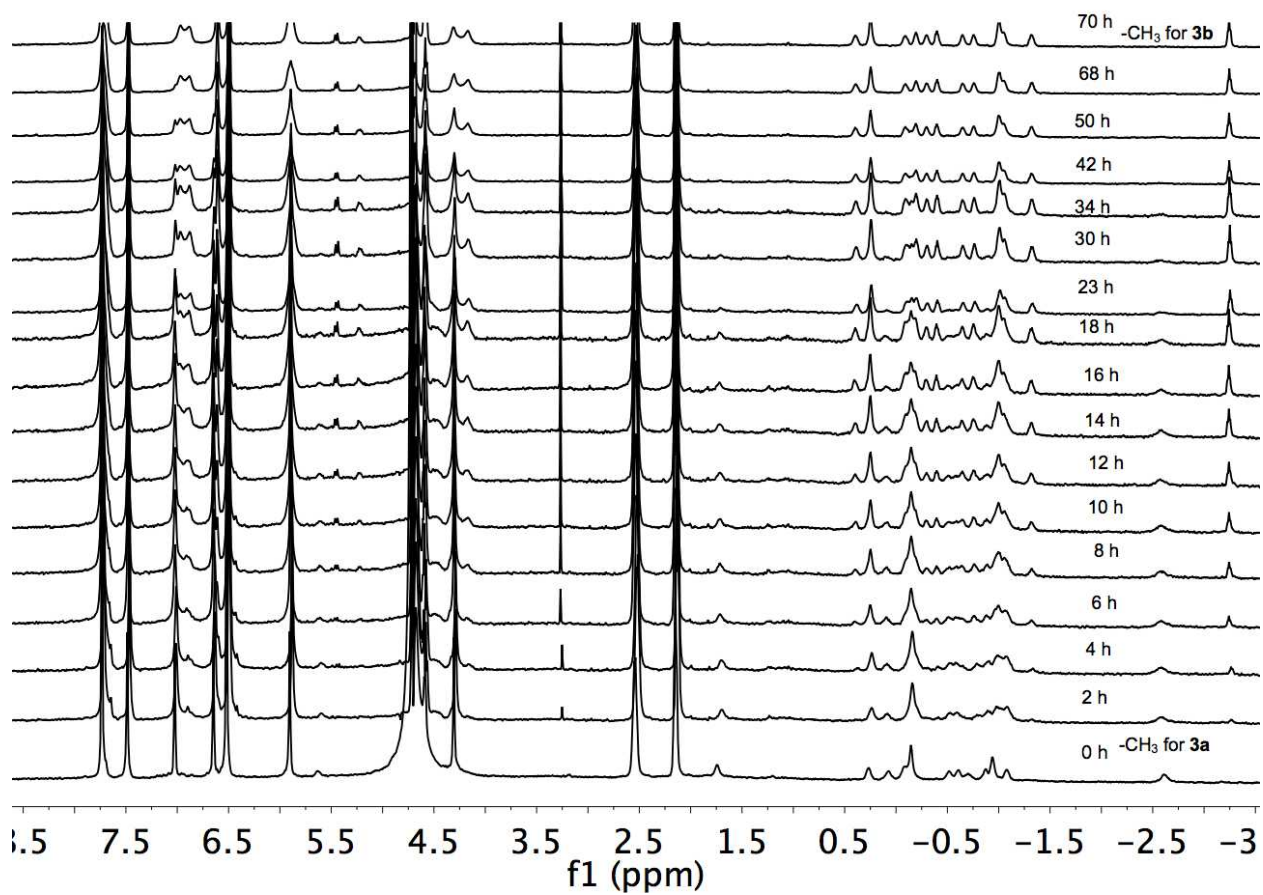

**Figure S14:** Stacked <sup>1</sup>H NMR spectra for the hydrolysis of encapsulated ester 3 (D<sub>2</sub>O, 25 °C, [Ester 3] = 0.5 mM, [NaOH] = 150 mM, [host] = 1 mM).



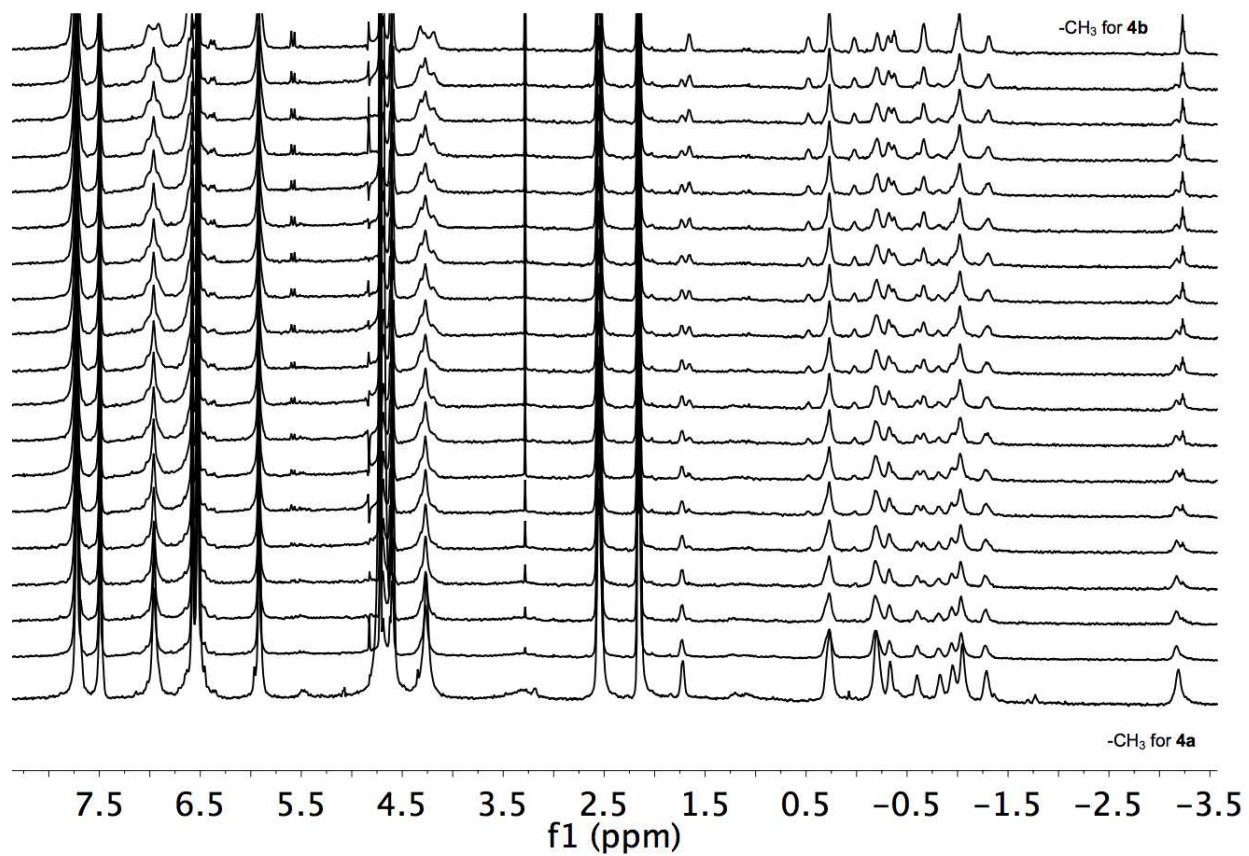

**Figure S15:** Stacked  $^1\text{H}$  NMR spectra for the hydrolysis of encapsulated ester **4** at 40 min. intervals ( $\text{D}_2\text{O}$ ,  $25^\circ\text{C}$ ,  $[\text{Ester } 4] = 0.5 \text{ mM}$ ,  $[\text{NaOH}] = 150 \text{ mM}$ ,  $[\text{host}] = 1 \text{ mM}$ ).

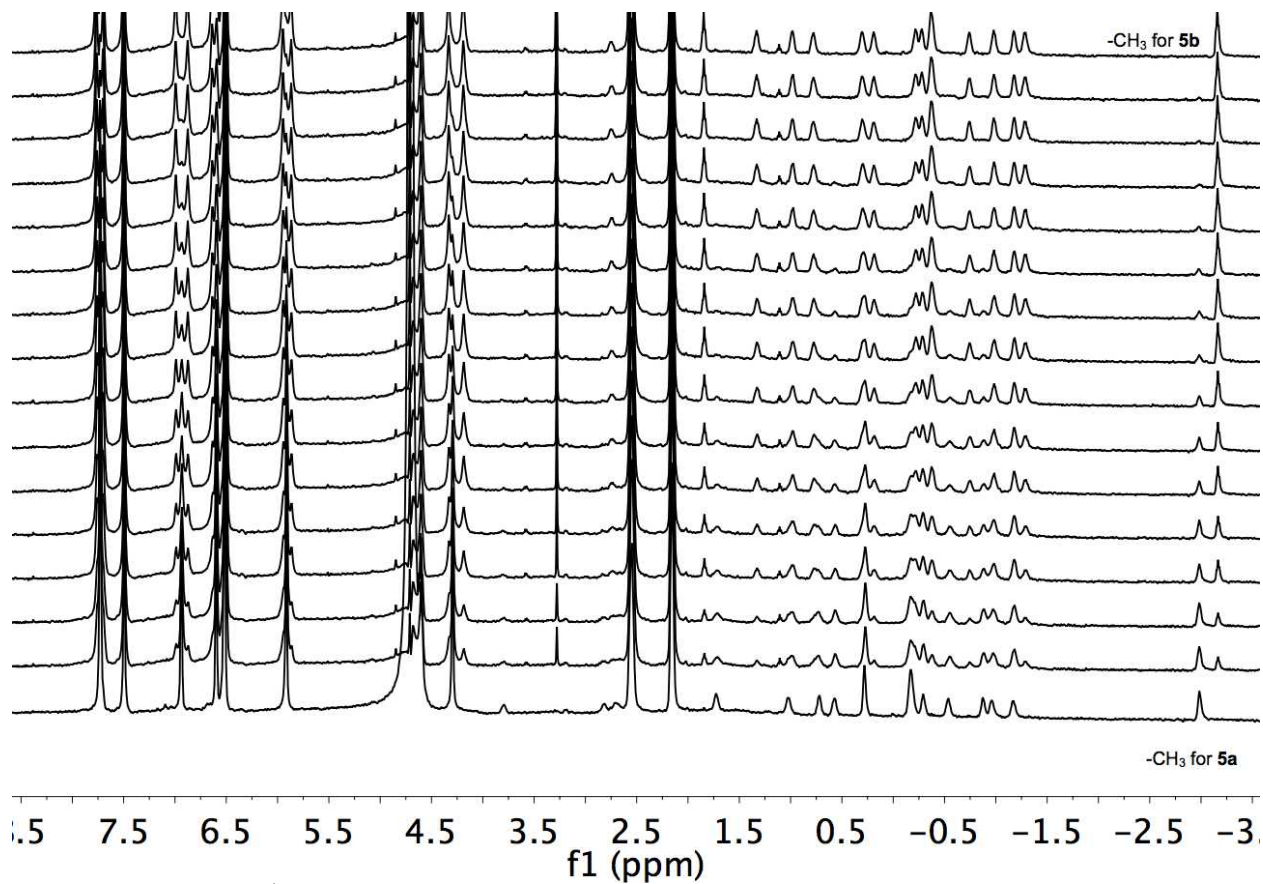

**Figure S16:** Stacked  $^1\text{H}$  NMR spectra for the hydrolysis of encapsulated ester **5** at 10 min. intervals ( $\text{D}_2\text{O}$ ,  $25^\circ\text{C}$ ,  $[\text{Ester } \mathbf{5}] = 0.5 \text{ mM}$ ,  $[\text{NaOH}] = 150 \text{ mM}$ ,  $[\text{host}] = 1 \text{ mM}$ ).

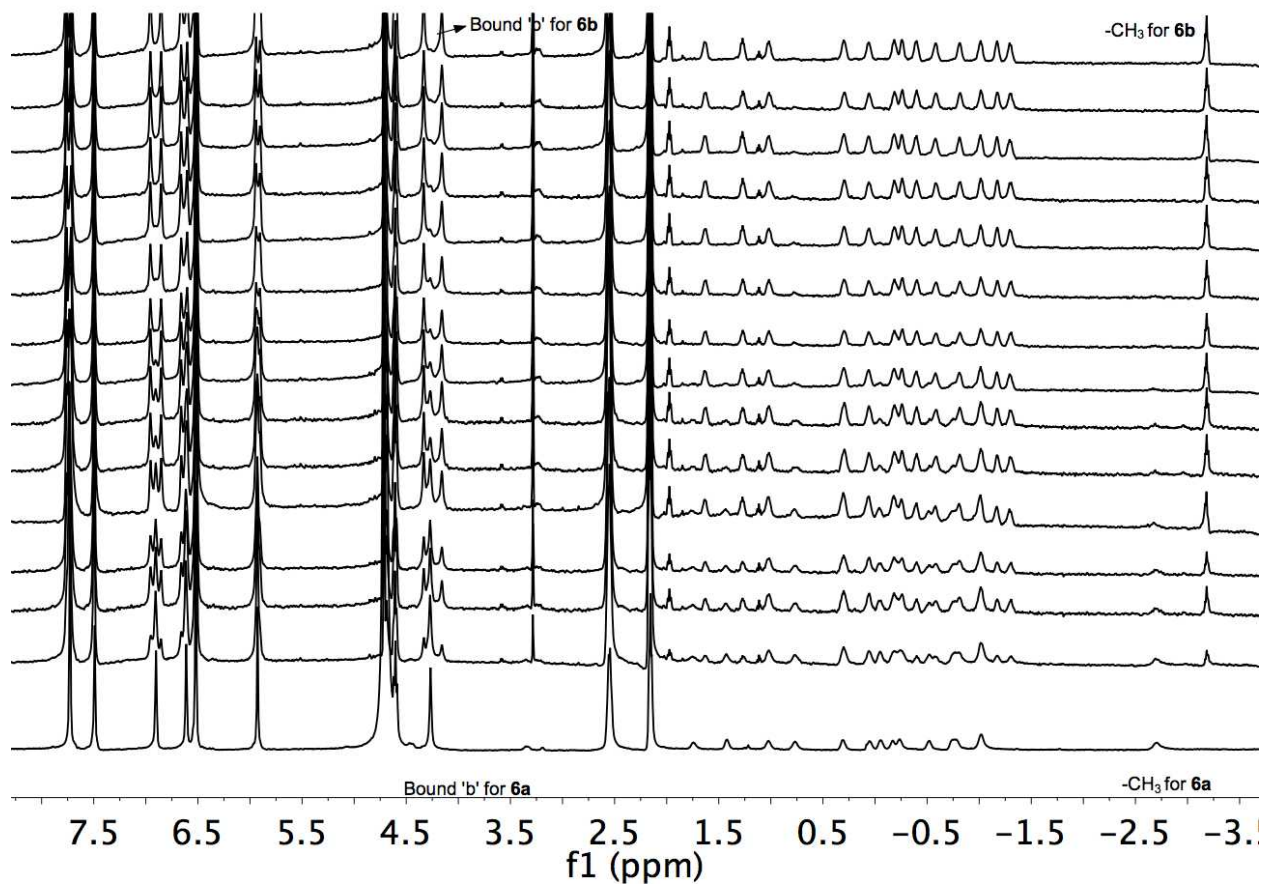

**Figure S17:** Stacked  $^1\text{H}$  NMR spectra for the hydrolysis of encapsulated ester **6** at 10 min. intervals ( $\text{D}_2\text{O}$ ,  $25^\circ\text{C}$ ,  $[\text{Ester } \mathbf{6}] = 0.5 \text{ mM}$ ,  $[\text{NaOH}] = 150 \text{ mM}$ ,  $[\text{host}] = 1 \text{ mM}$ ).

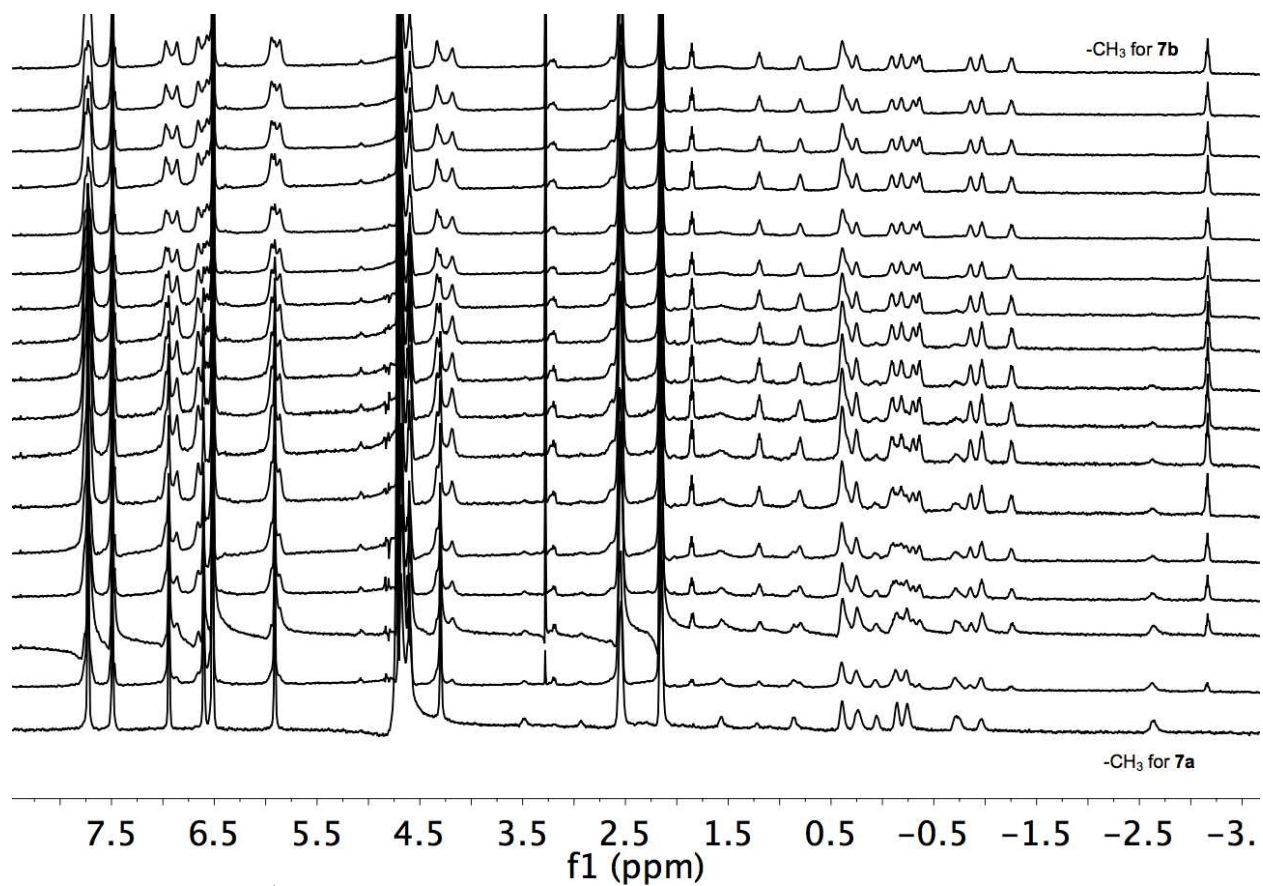

**Figure S18:** Stacked  $^1\text{H}$  NMR spectra for the hydrolysis of encapsulated ester **7** at 10 min. intervals ( $\text{D}_2\text{O}$ ,  $25^\circ\text{C}$ ,  $[\text{Ester } 7] = 0.5 \text{ mM}$ ,  $[\text{NaOH}] = 150 \text{ mM}$ ,  $[\text{host}] = 1 \text{ mM}$ ).

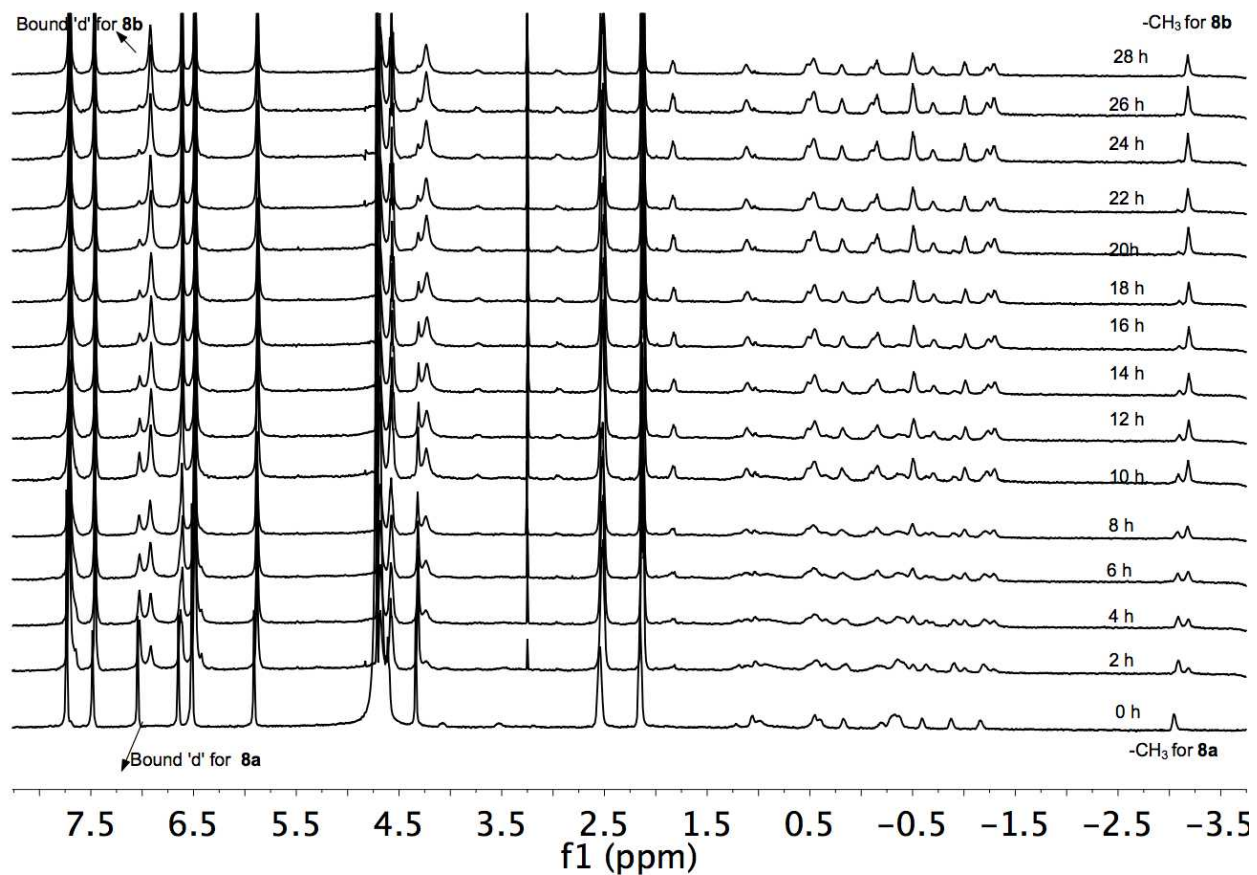

**Figure S19:** Stacked  $^1\text{H}$  NMR spectra for the hydrolysis of encapsulated ester **8** at 2 h. intervals ( $\text{D}_2\text{O}$ ,  $25^\circ\text{C}$ , [Ester **8**] = 0.5 mM,  $[\text{NaOH}] = 150$  mM, [host] = 1 mM).

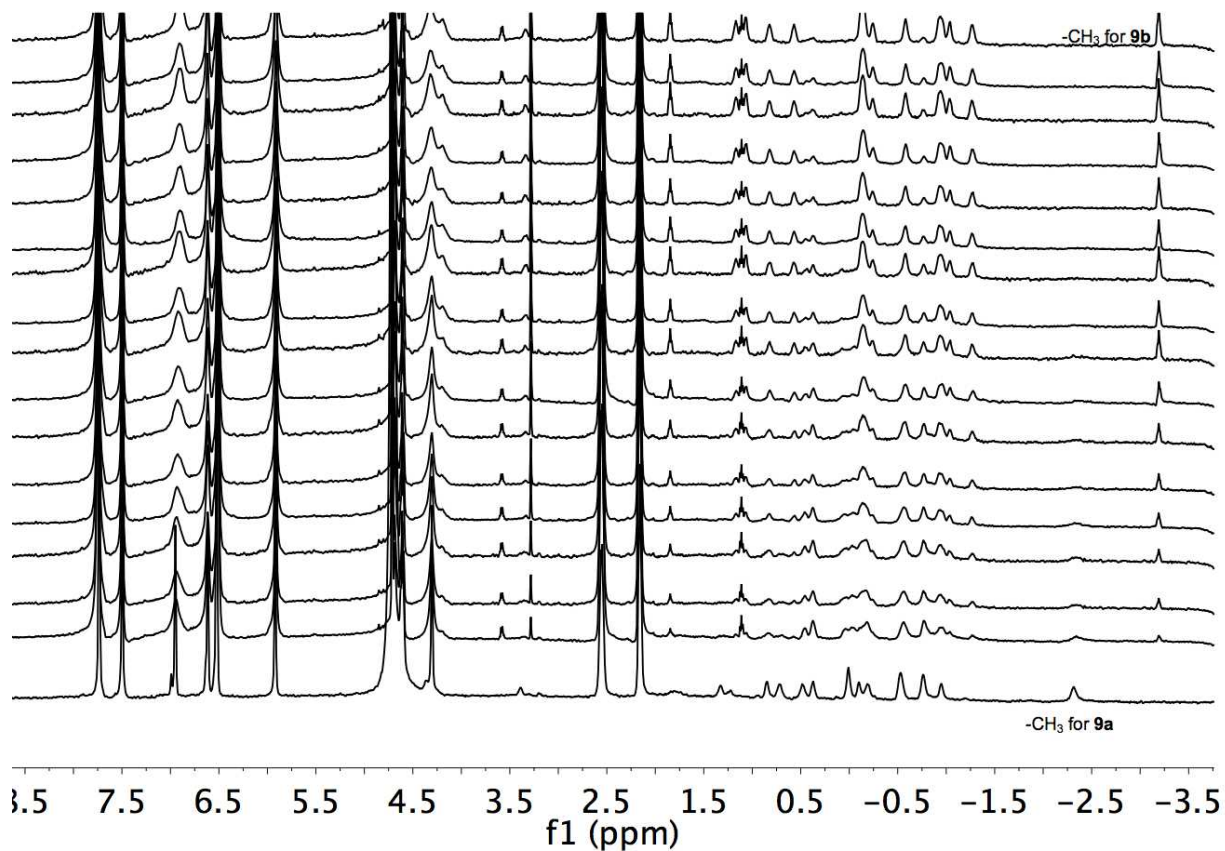

**Figure S20:** Stacked  $^1\text{H}$  NMR spectra for the hydrolysis of encapsulated ester **9** at 10 min. intervals ( $\text{D}_2\text{O}$ ,  $25^\circ\text{C}$ ,  $[\text{Ester } \mathbf{9}] = 0.5 \text{ mM}$ ,  $[\text{NaOH}] = 150 \text{ mM}$ ,  $[\text{host}] = 1 \text{ mM}$ ).

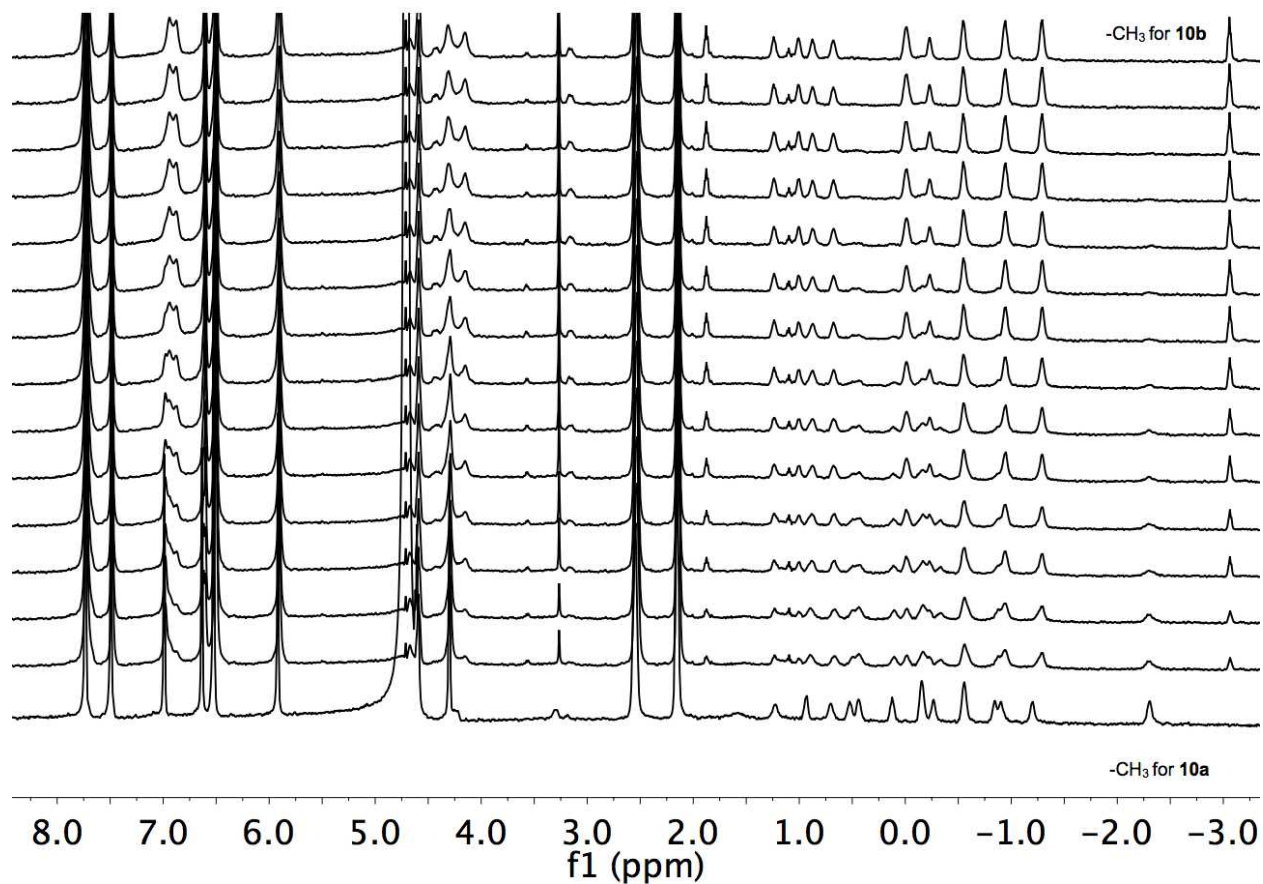

**Figure S21:** Stacked <sup>1</sup>H NMR spectra for the hydrolysis of encapsulated ester **10** at 10 min. intervals (D<sub>2</sub>O, 25 °C, [Ester **10**] = 0.5 mM, [NaOH] = 150 mM, [host] = 1 mM).

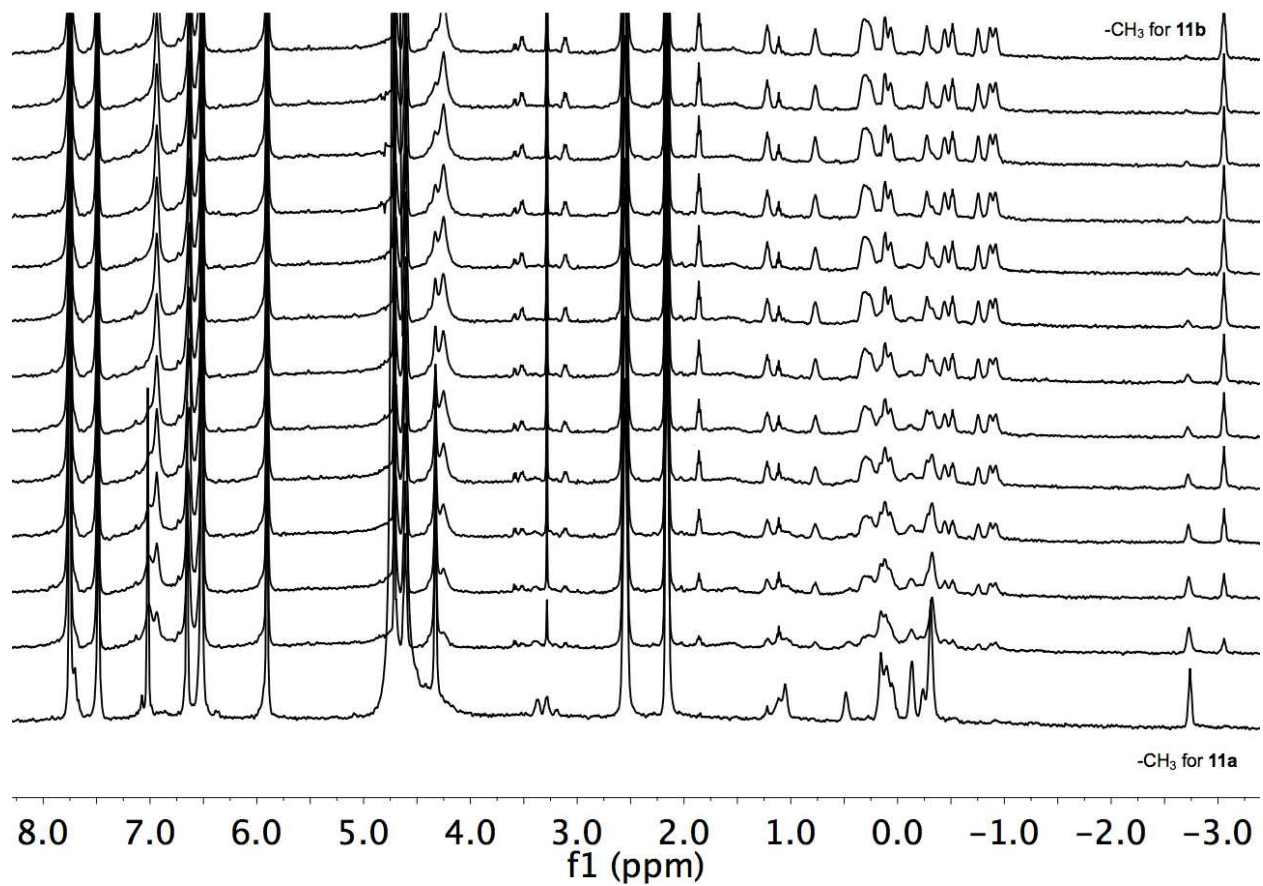

**Figure S22:** Stacked <sup>1</sup>H NMR spectra for the hydrolysis of encapsulated ester **11** at 40 min. intervals (D<sub>2</sub>O, 25 °C, [Ester **11**] = 0.5 mM, [NaOH] = 150 mM, [host] = 1 mM).



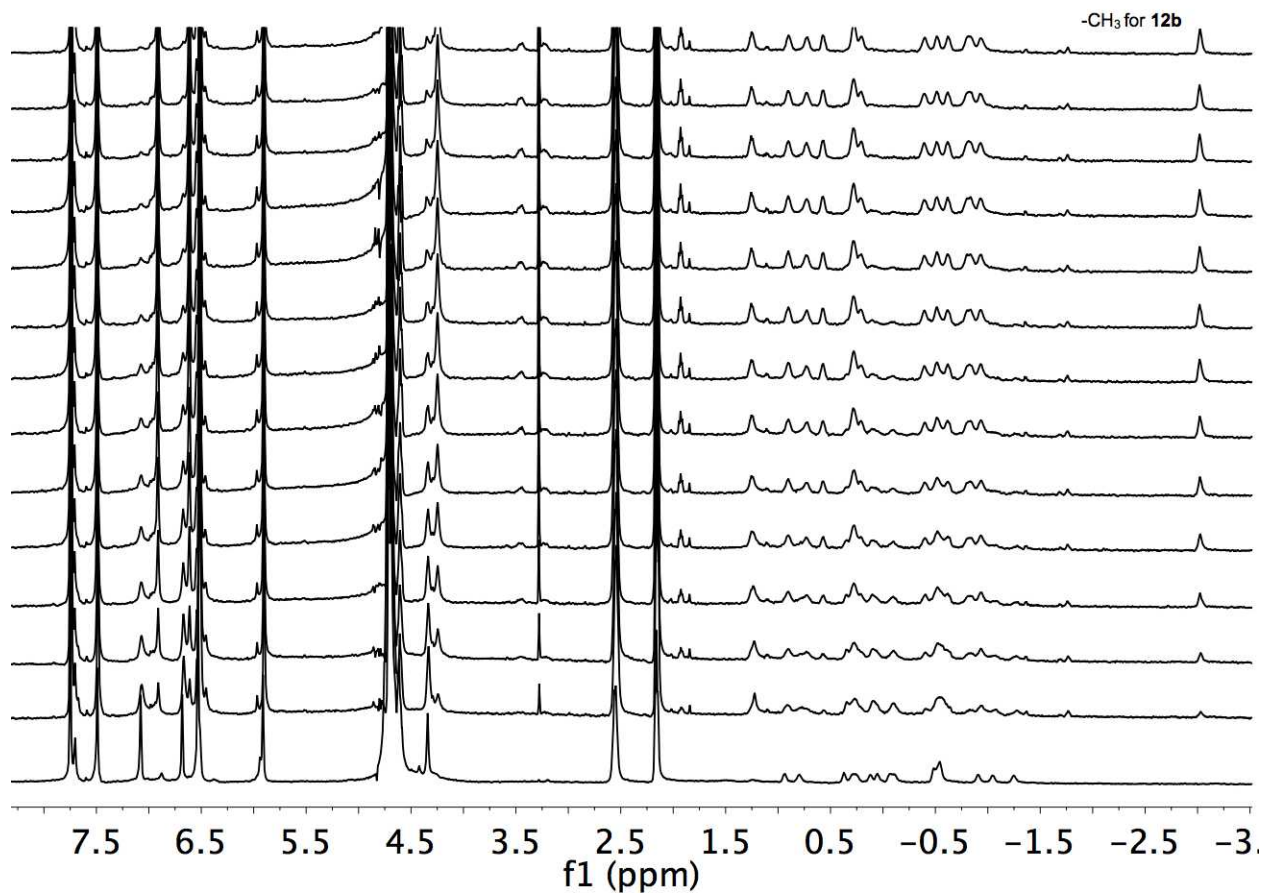

**Figure S23:** Stacked  $^1\text{H}$  NMR spectra for the hydrolysis of encapsulated ester **12** at 1 h. intervals ( $\text{D}_2\text{O}$ , 25 °C, [Ester **12**] = 0.5 mM, [NaOH] = 150 mM, [host] = 1 mM).

#### 4 Kinetic data for the hydrolysis of free and encapsulated ester 3-12

Each hydrolysis experiment was carried out in at least duplicate. Fitting of the data was performed using Origin Pro 2016 (mono-exponential growth function,  $y = A1 \cdot \exp(-x/t1) + y0$ , where the rate constant  $k$  is the inverse of the life time ( $t1$ ). In all cases reaction was confirmed to be pseudo-first order. All  $R^2$  values were  $> 0.99$ . Figure S25-S34 show the hydrolysis rate of the free ester **3-12**. Figure S35-S45 shows the hydrolysis rate of encapsulated ester **2-12**. Table S1 summarizes the hydrolysis rate constant for the free and bound esters, and the corresponding ratio of these rates. A plot of  $K_{rel}$  versus  $k_{free}/k_{bound}$  is shown in Figure S24.

For non-conjugated esters **5-12**, the free hydrolysis rates ( $k_{free}$ ) were approximately the same, while the hydrolysis rate  $k_{bound}$  varies dependent on the binding conformation of the guest inside the host **1**.

**Table S1:** Hydrolysis rates of free ( $k_{free}$ ), encapsulated ( $k_{bound}$ ), and the  $k_{free}:k_{bound}$  ratio for esters **2-12**

| Guest     | $k_{free}^{a,b}$<br>( $\times 10^{-3} \text{ min}^{-1}$ ) | $k_{bound}^{a,c}$<br>( $\times 10^{-3} \text{ min}^{-1}$ ) | $k_{free} : k_{bound}$ |
|-----------|-----------------------------------------------------------|------------------------------------------------------------|------------------------|
| <b>2</b>  | - <sup>d</sup>                                            | 13.37                                                      | -                      |
| <b>3</b>  | 2.71                                                      | 0.61                                                       | 4.44                   |
| <b>4</b>  | 4.23                                                      | 1.94                                                       | 2.18                   |
| <b>5</b>  | 16.65                                                     | 11.18                                                      | 1.49                   |
| <b>6</b>  | 17.04                                                     | 13.38                                                      | 1.27                   |
| <b>7</b>  | 16.04                                                     | 11.57                                                      | 1.39                   |
| <b>8</b>  | 16.72                                                     | 2.73                                                       | 6.12                   |
| <b>9</b>  | 14.12                                                     | 13.14                                                      | 1.07                   |
| <b>10</b> | 15.03                                                     | 11.69                                                      | 1.29                   |
| <b>11</b> | 15.38                                                     | 6.80                                                       | 2.26                   |
| <b>12</b> | 14.19                                                     | 2.45                                                       | 5.80 $\beta$           |

<sup>a</sup> Average of two trials. Errors  $< 10\%$ .

<sup>b</sup> 0.5 mM ester in 150 mM NaOH in 40% acetone- $d_6$ /D<sub>2</sub>O.

<sup>c</sup> 0.5 mM ester in 150 mM NaOH in D<sub>2</sub>O.

<sup>d</sup> High amounts of acetone required to ensure homogeneity, resulted in incompatible data.

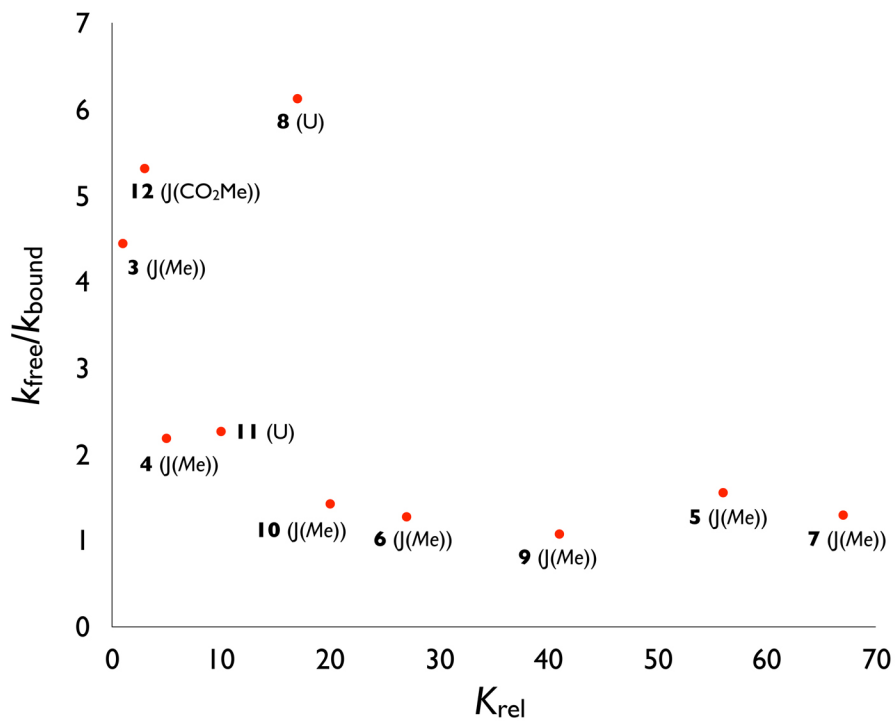

Figure S24: Plot of  $K_{rel}$  versus  $k_{free}/k_{bound}$ .

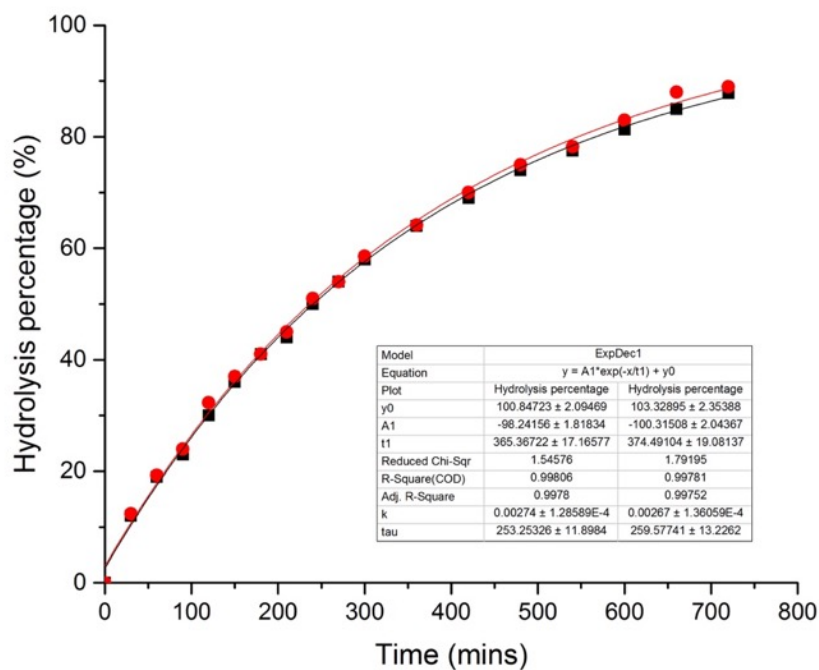

Figure S25: Hydrolysis of 0.5 mM free guest 3 in 150 mM NaOH in 40% acetone-d<sub>6</sub>/D<sub>2</sub>O (two trials).

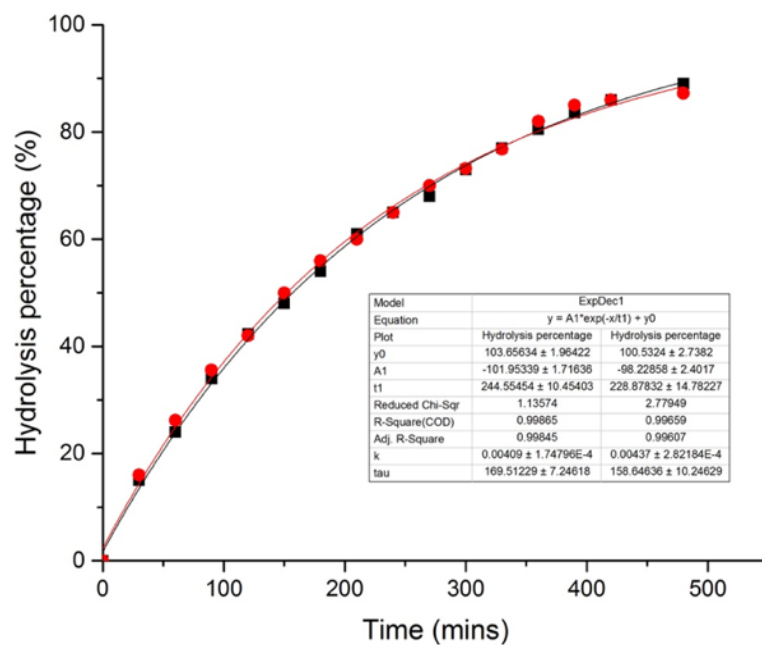

**Figure S26:** Hydrolysis of 0.5 mM free guest **4** in 150 mM NaOH in 40% acetone- $d_6$ /D $_2$ O (two trials).

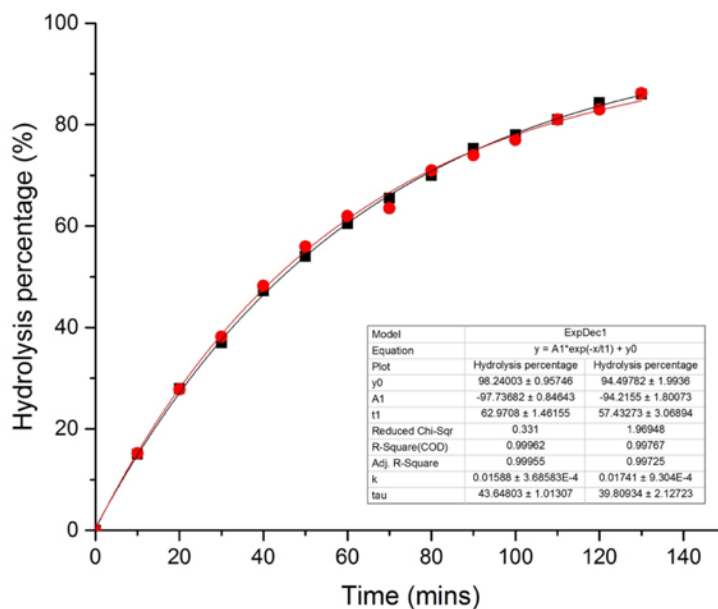

**Figure S27:** Hydrolysis of 0.5 mM free guest **5** in 150 mM NaOH in 40% acetone- $d_6$ /D $_2$ O (two trials).

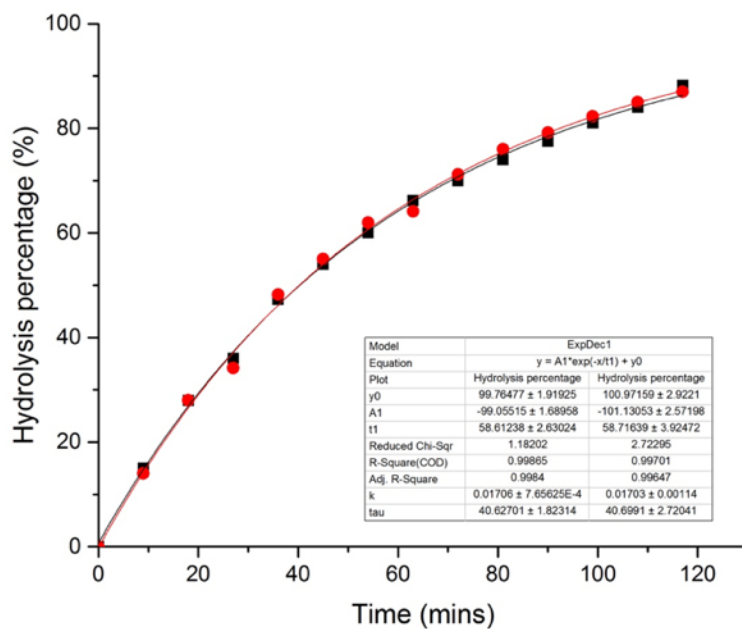

**Figure S28:** Hydrolysis of 0.5 mM free guest **6** in 150 mM NaOH in 40% acetone- $d_6$ /D $_2$ O (two trials).

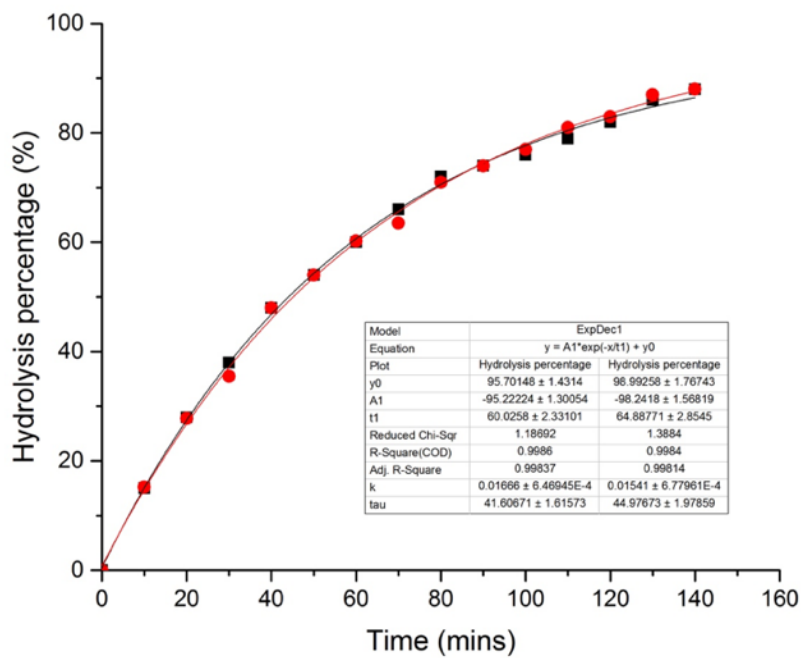

**Figure S29:** Hydrolysis of 0.5 mM free guest **7** in 150 mM NaOH in 40% acetone- $d_6$ /D $_2$ O (two trials).

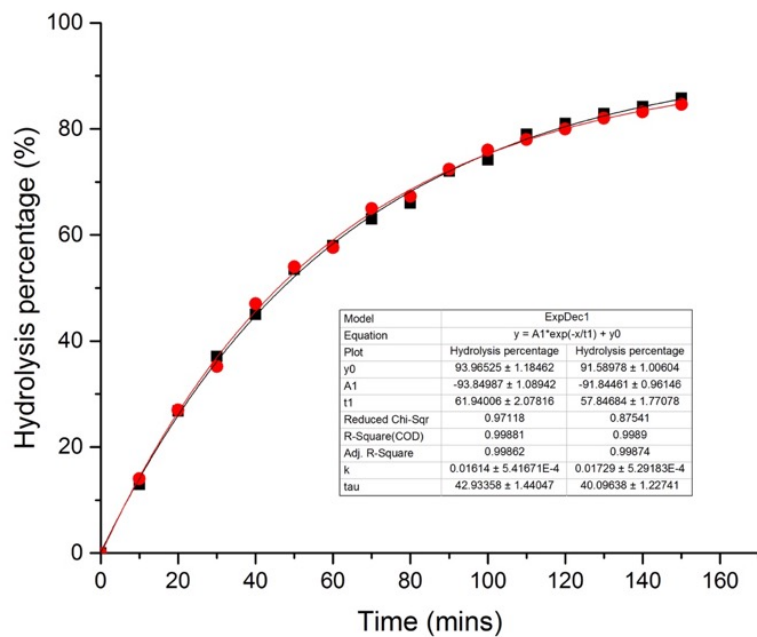

**Figure S30:** Hydrolysis of 0.5 mM free guest **8** in 150 mM NaOH in 40% acetone-d<sub>6</sub>/D<sub>2</sub>O (two trials).

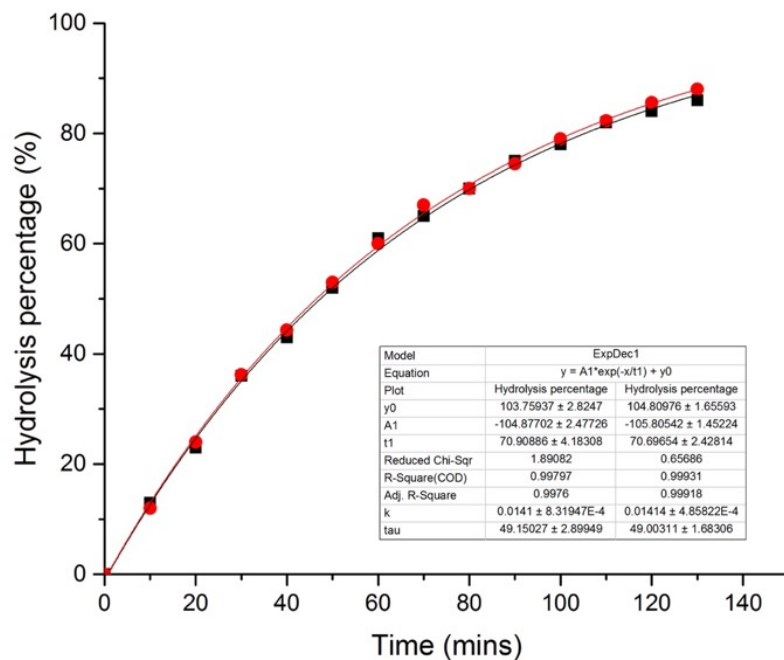

**Figure S31:** Hydrolysis of 0.5 mM free guest **9** in 150 mM NaOH in 40% acetone-d<sub>6</sub>/D<sub>2</sub>O (two trials).

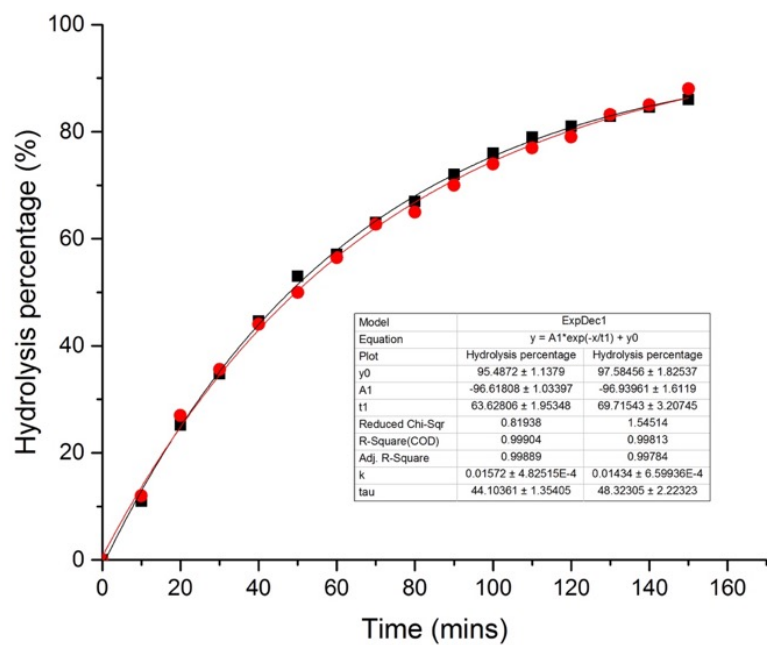

Figure S32: Hydrolysis of 0.5 mM free guest **10** in 150 mM NaOH in 40% acetone- $d_6$ /D $_2$ O (two trials).

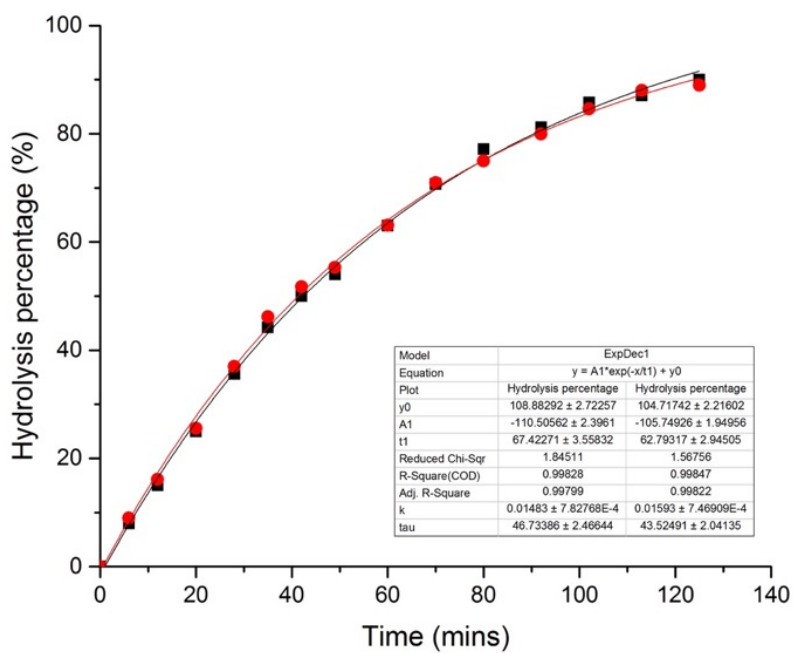

Figure S33: Hydrolysis of 0.5 mM free guest **11** in 150 mM NaOH in 40% acetone- $d_6$ /D $_2$ O (two trials).

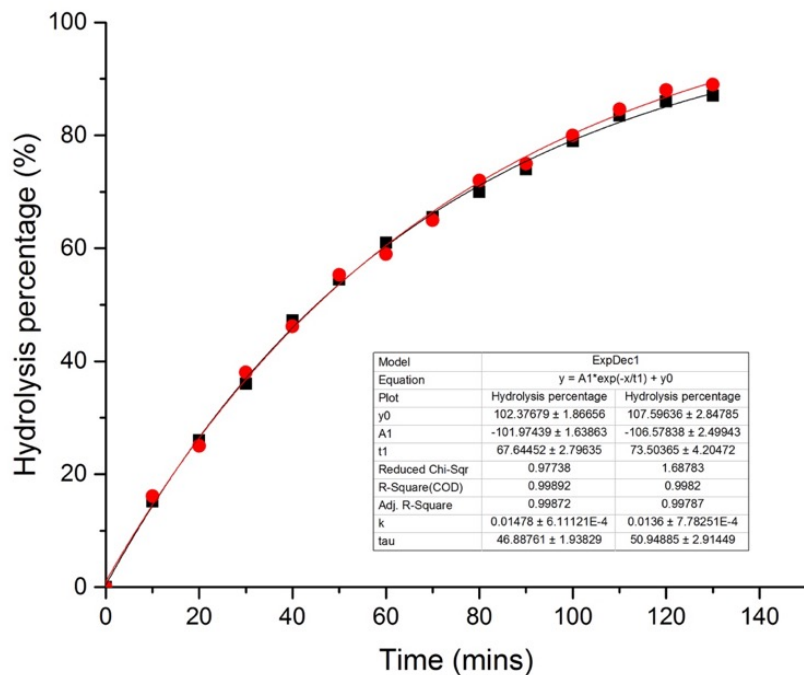

Figure S34: Hydrolysis of 0.5 mM free guest **12** in 150 mM NaOH in 40% acetone- $d_6$ /D $_2$ O (two trials).

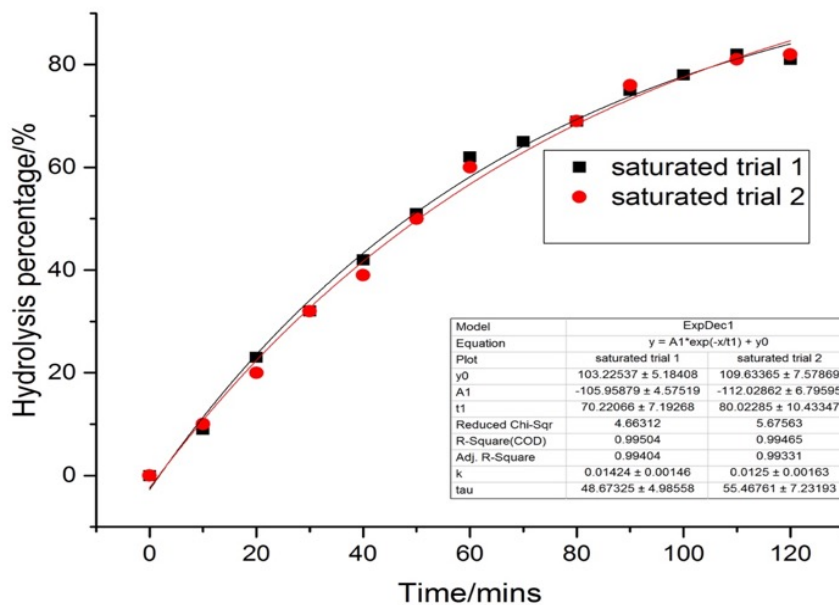

Figure S35: Hydrolysis of 0.5 mM encapsulated guest **2** in 150 mM NaOH in D $_2$ O (two trials).



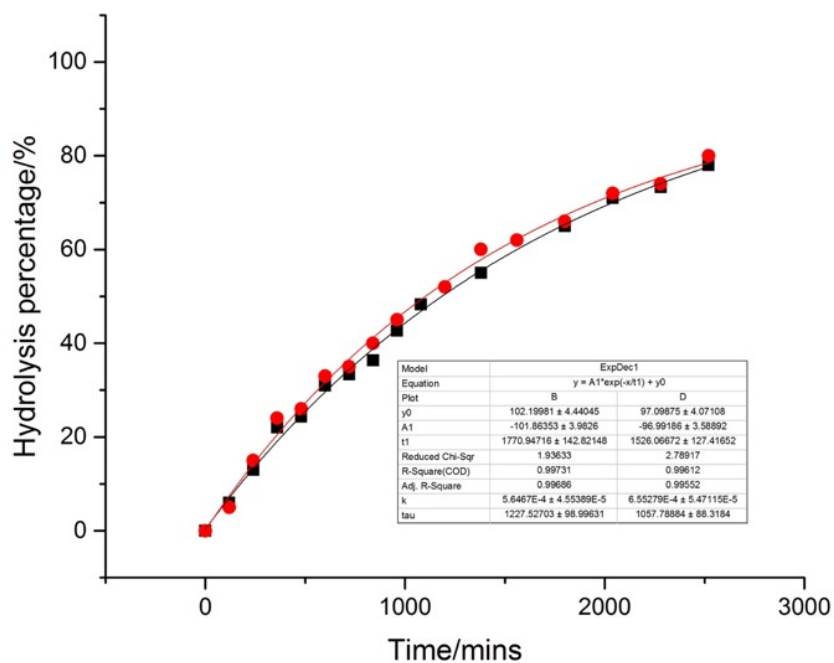

Figure S36: Hydrolysis of 0.5 mM encapsulated guest **3** in 150 mM NaOH in D<sub>2</sub>O (two trials).

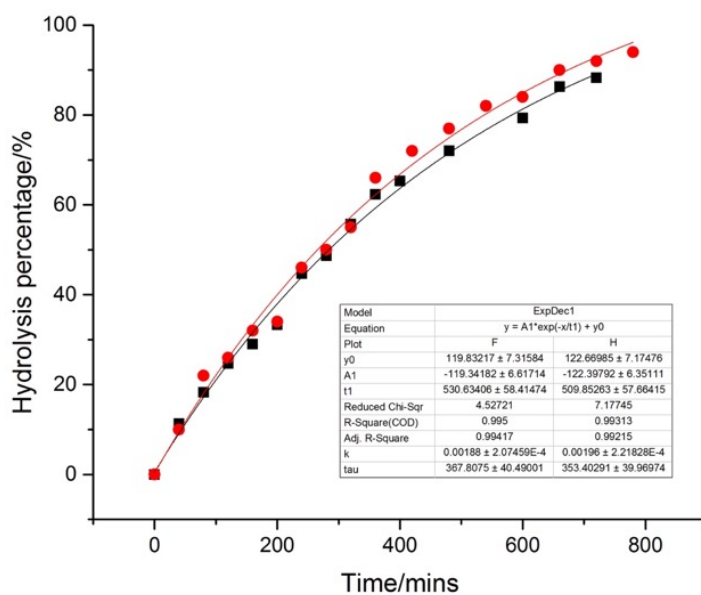

Figure S37: Hydrolysis of 0.5 mM encapsulated guest **4** in 150 mM NaOH in D<sub>2</sub>O (two trials).

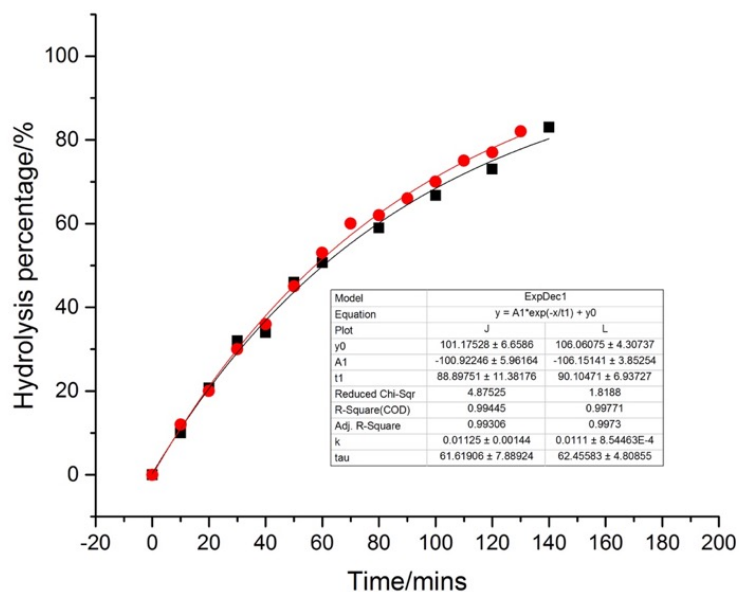

Figure S38: Hydrolysis of 0.5 mM encapsulated guest **5** in 150 mM NaOH in D<sub>2</sub>O (two trials).

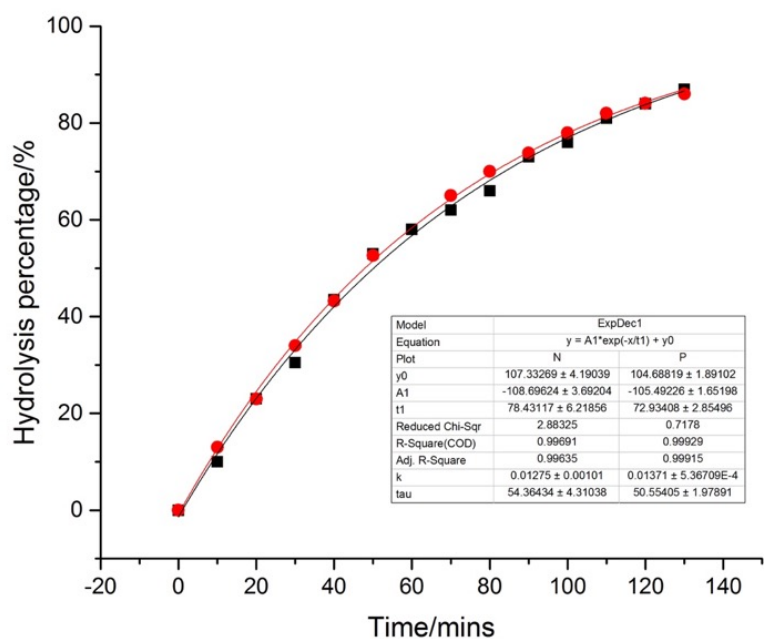

Figure S39: Hydrolysis of 0.5 mM encapsulated guest **6** in 150 mM NaOH in D<sub>2</sub>O (two trials).

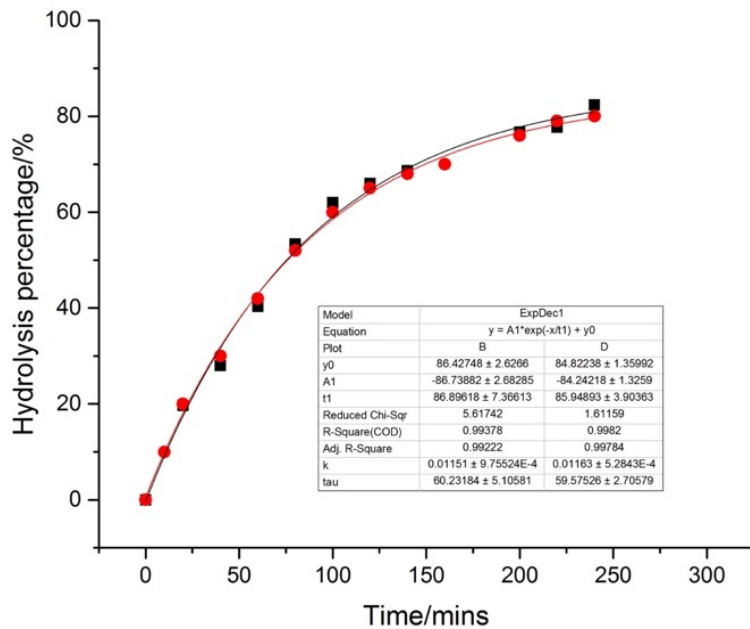

Figure S40: Hydrolysis of 0.5 mM encapsulated guest 7 in 150 mM NaOH in D<sub>2</sub>O (two trials).

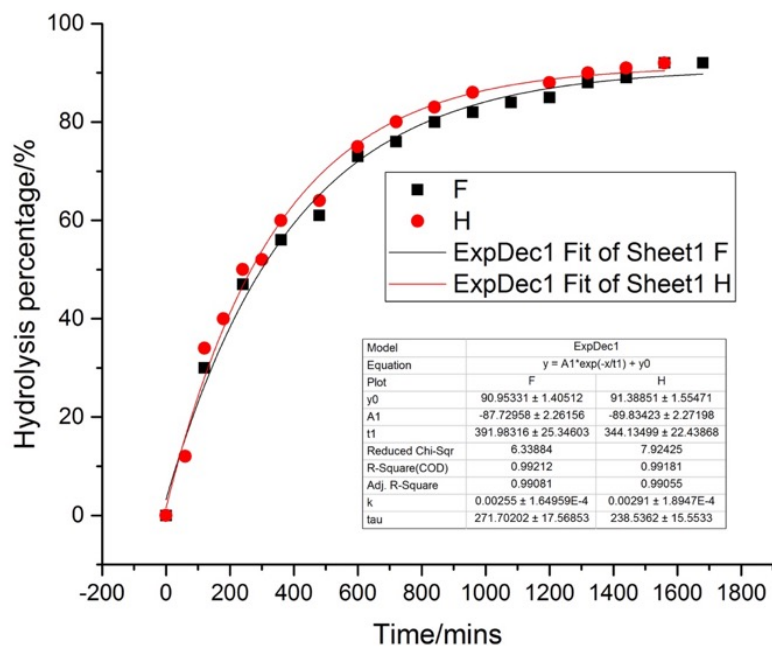

Figure S41: Hydrolysis of 0.5 mM encapsulated guest 8 in 150 mM NaOH in D<sub>2</sub>O (two trials).

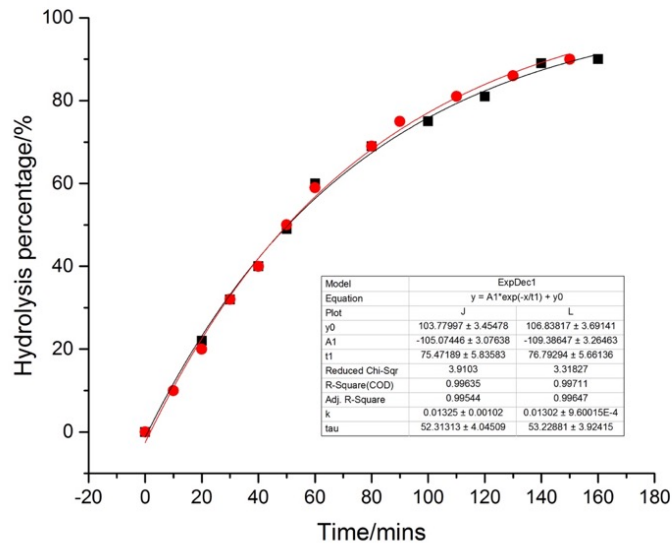

Figure S42: Hydrolysis of 0.5 mM encapsulated guest **9** in 150 mM NaOH in D<sub>2</sub>O (two trials).

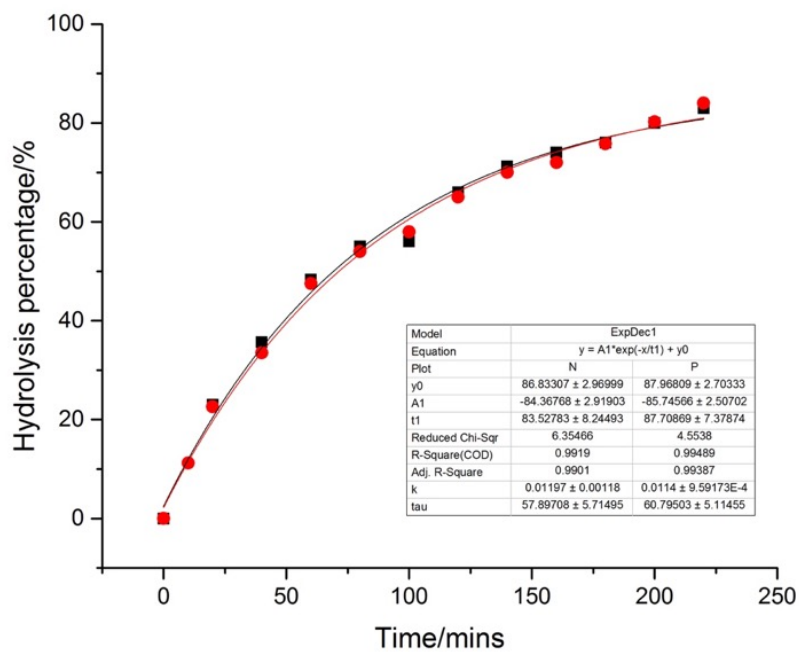

Figure S43: Hydrolysis of 0.5 mM encapsulated guest **10** in 150 mM NaOH in D<sub>2</sub>O (two trials).

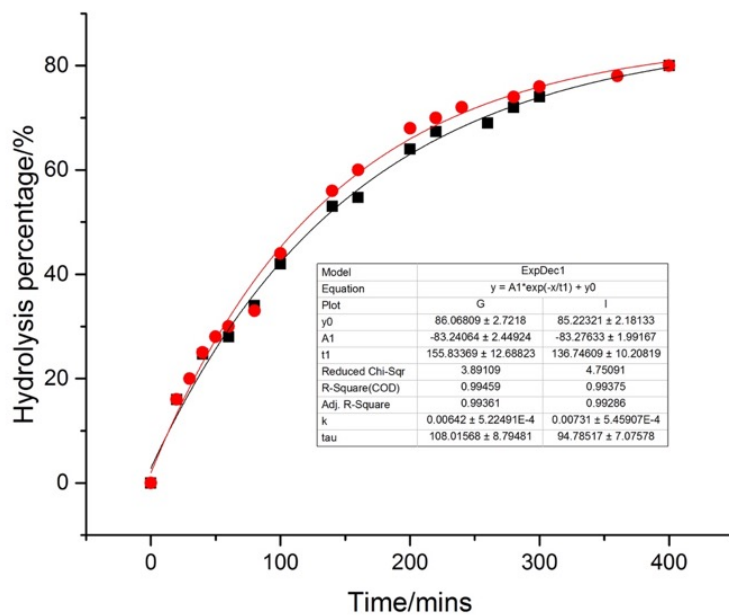

**Figure S44:** Hydrolysis of 0.5 mM encapsulated guest **11** in 150 mM NaOH in D<sub>2</sub>O (two trials).

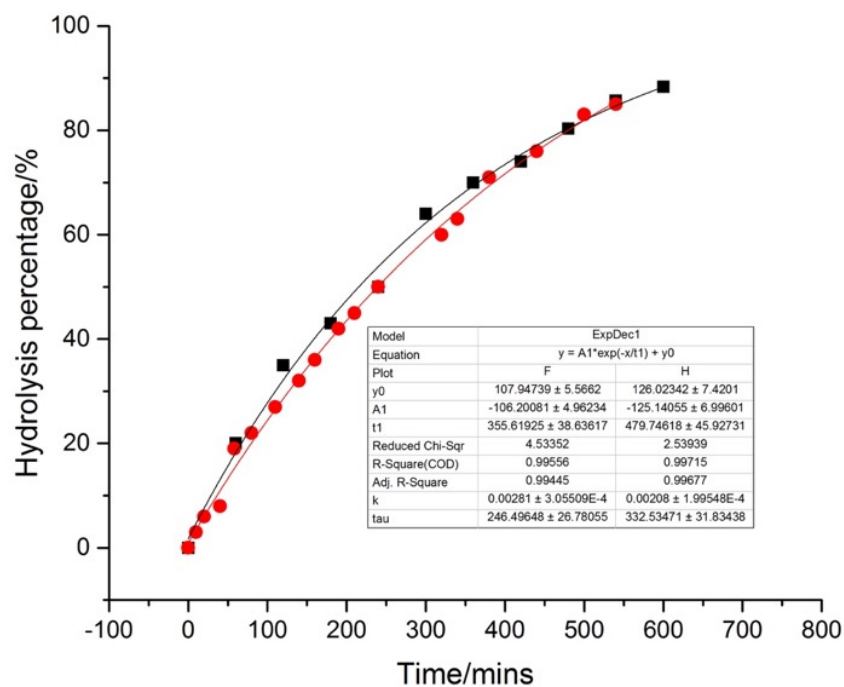

**Figure S45:** Hydrolysis of 0.5 mM encapsulated guest **12** in 150 mM NaOH in D<sub>2</sub>O (two trials).

## 5 Competition experiments

Based on the above results, competition experiments involving the best-protected guest (**8**) with two of the poorest protected guests (**7** and **10**) were carried out. In these experiments, a ratio of host to guests of 4:1:1 ([host] = 1 mM, [guest 1] = 0.25 mM, [guest 2] = 0.25 mM) was required to ensure homogeneity. Integration of the terminal  $-\text{CH}_3$  group of ester and acid allowed the calculation of the amount of remaining (strongly protected) guest when 100% of the less protected guest had undergone complete hydrolysis. Figure S46 shows the hydrolysis of encapsulated ester **7** and **8** within host **1** as a function of time. When 100% of **7** was hydrolyzed 34% of **8** had been hydrolyzed. Figure S47 shows the corresponding data for **8** and **10**. When 100% of **10** was hydrolyzed, only 32% of **8** was hydrolyzed.

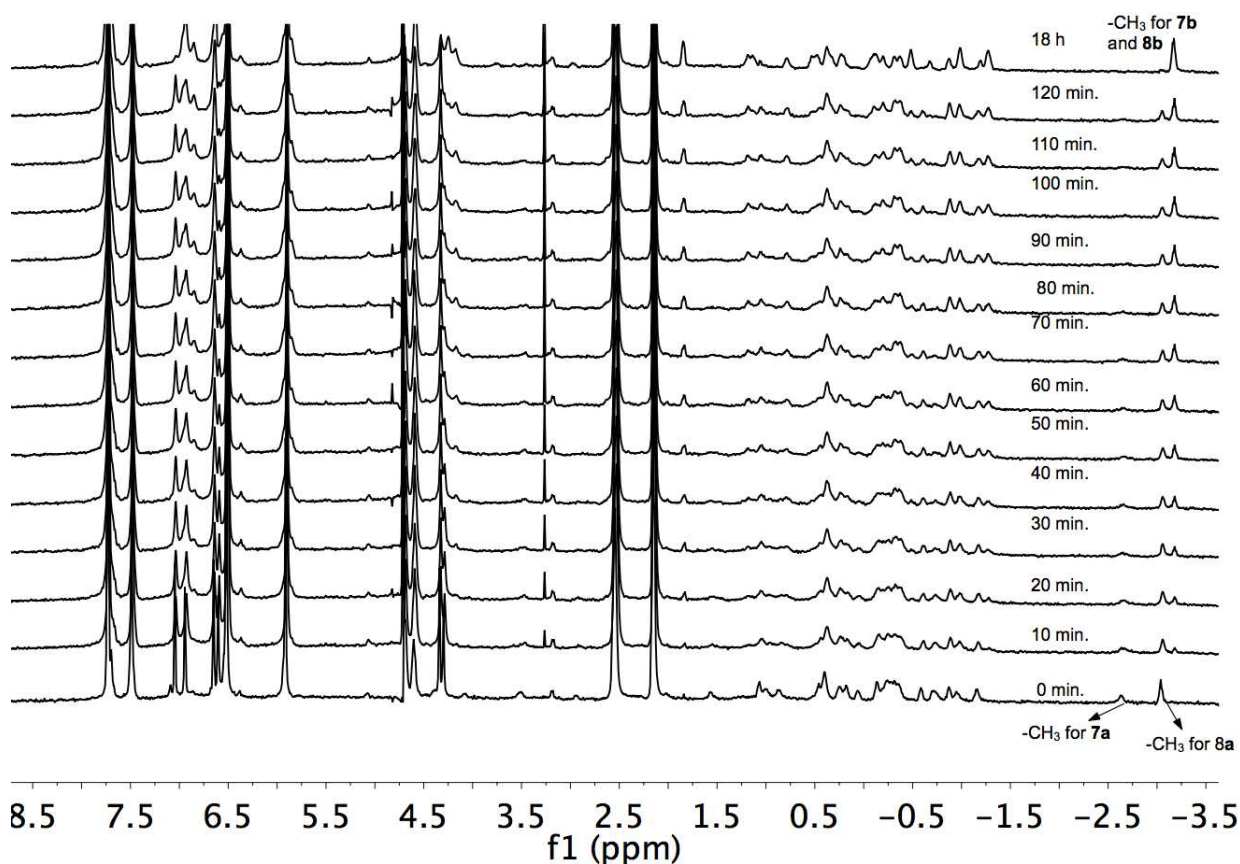

**Figure S46:** Stacked  $^1\text{H}$  NMR spectra for the hydrolysis of encapsulated ester **7** and **8** within host **1** as a function of time. ( $\text{D}_2\text{O}$ , 25 °C, ([host] = 1 mM, [**7**] = 0.25 mM, [**8**] = 0.25 mM).

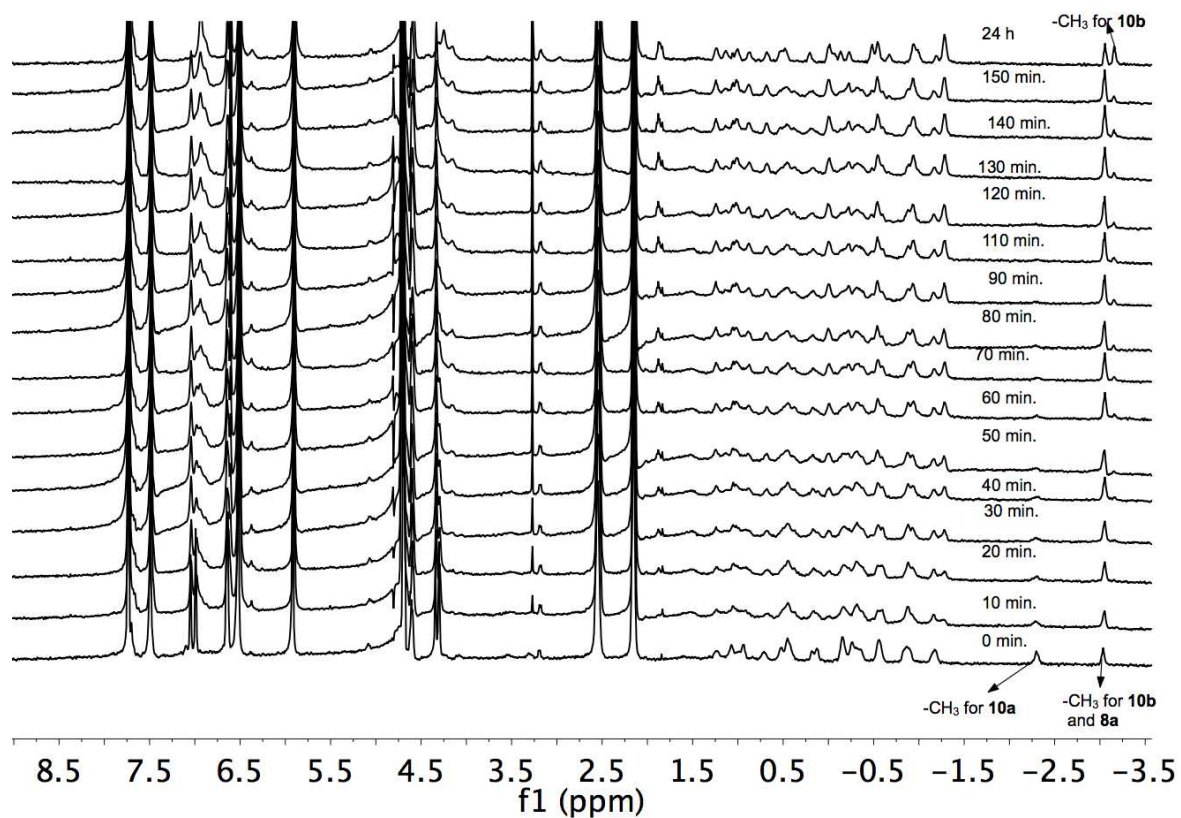

**Figure S47:** Stacked  $^1\text{H}$  NMR spectra for the hydrolysis of encapsulated ester **8** and **10** within host **1** as a function of time. ( $\text{D}_2\text{O}$ ,  $25^\circ\text{C}$ , ( $[\text{host}] = 1\text{ mM}$ ,  $[\mathbf{8}] = 0.25\text{ mM}$ ,  $[\mathbf{10}] = 0.25\text{ mM}$ ).

## 6 Mechanistic studies of the hydrolysis of encapsulated esters using H<sub>2</sub><sup>18</sup>O

The guests esters could in principle be hydrolyzed by as many as four different mechanisms under basic conditions.<sup>4</sup> The B<sub>AC</sub>2 hydrolysis (Scheme S1) is the most common mechanism. However, for methyl esters possessing large, bulky alkyl groups there is also the possibility of hydrolysis occurring through a B<sub>AL</sub>2 mechanism.

To explore the hydrolysis mechanism of encapsulated esters reaction, the hydrolysis of guests **6**, **7**, **8**, **11**, **12** were carried out in H<sub>2</sub><sup>18</sup>O. Thus, 92 mg of cleaned sodium metal (washed in pentane to remove mineral oil) was added to 1 mL H<sub>2</sub><sup>18</sup>O to make a 4 M Na<sup>18</sup>OH stock solution. A 1 mM solution of host **1** in 8 mM Na<sup>18</sup>OH was then formed using H<sub>2</sub><sup>18</sup>O and the corresponding complex formed by stirring excess guests with the solution of host **1**. This solution/suspension was then filter through a 0.1 μm Durapore Hydrophilic PVDF (polyvinylidene fluoride) filter membrane to get remove excess guest. 30 μL of 4 M Na<sup>18</sup>OH solution was then added, and the solution stirred gently for 24 h to bring about hydrolysis. Chloroform was then added to extract the hydrolysis product, the organic layer dried with anhydrous magnesium sulfate, and the solvent removed under reduced pressure.

ESI-MS data was collected from methanol solutions of the extract in positive ion mode. Ions were continuously generated by infusing the MeOH solution samples into the source with a syringe pump at flow rates of 6 μL/min. The parameters were adjusted typically as follows: capillary voltage (−4.1 kV); capillary exit voltage (140 V); skimmer voltage (40 V); and drying gas temperature (200 °C). All experiments were carried out with a nebulizer gas pressure of 0.3 Bar and a drying gas flow of 4.0 L/min. Figure S49–S53 shows the resulting data. The unlabeled acid derivatives (C<sub>18</sub>H<sub>34</sub>O<sub>2</sub>, Mw = 282 g/mol) were observed as the carboxylate plus two sodium ions and appeared as m/z 327.2, 328.2 and 329.2 (e.g., Figure S48, upper portion). This matched the predicted MS (Figure S48, lower portion). The m/z shift of 2 Daltons for the <sup>18</sup>O isotope labeled sample (C<sub>18</sub>H<sub>33</sub>O<sup>18</sup>O + 2•Na<sup>+</sup>) appeared at m/z 329.2, 330.2, and 331.2 and matched the theoretical. For the five samples examined (Figures S49–53, upper portions) the major species observed (> 90%) was the <sup>18</sup>O labeled species and not the calculated, unlabeled C<sub>18</sub>H<sub>33</sub>O<sub>2</sub>+2•Na<sup>+</sup> (corresponding lower portions). The small peaks at m/z 327.2 and 328.2 corresponds to the unlabeled water derived from the 5% H<sub>2</sub>O present in H<sub>2</sub><sup>18</sup>O sample.

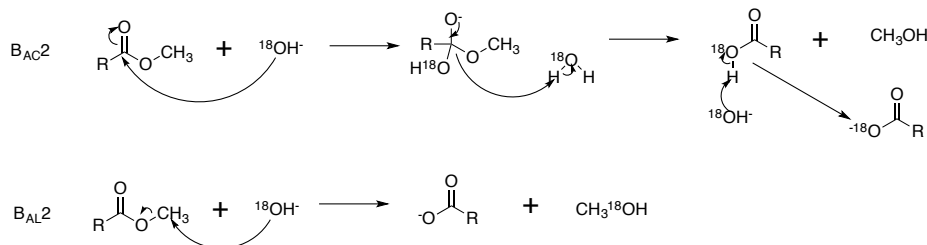

**Scheme S1:** B<sub>AC</sub>2 and B<sub>AL</sub>2 mechanism for ester hydrolysis.



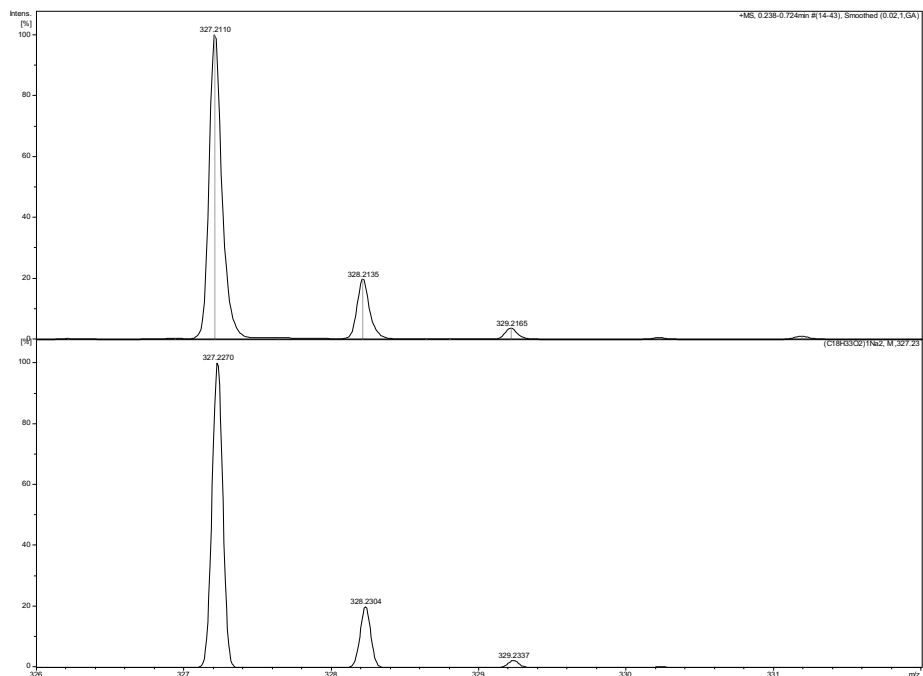

**Figure S48:** ESI-MS of hydrolysis product from guest **7** (top) in H<sub>2</sub>O and theoretical calculations of normal acid **7** (below).

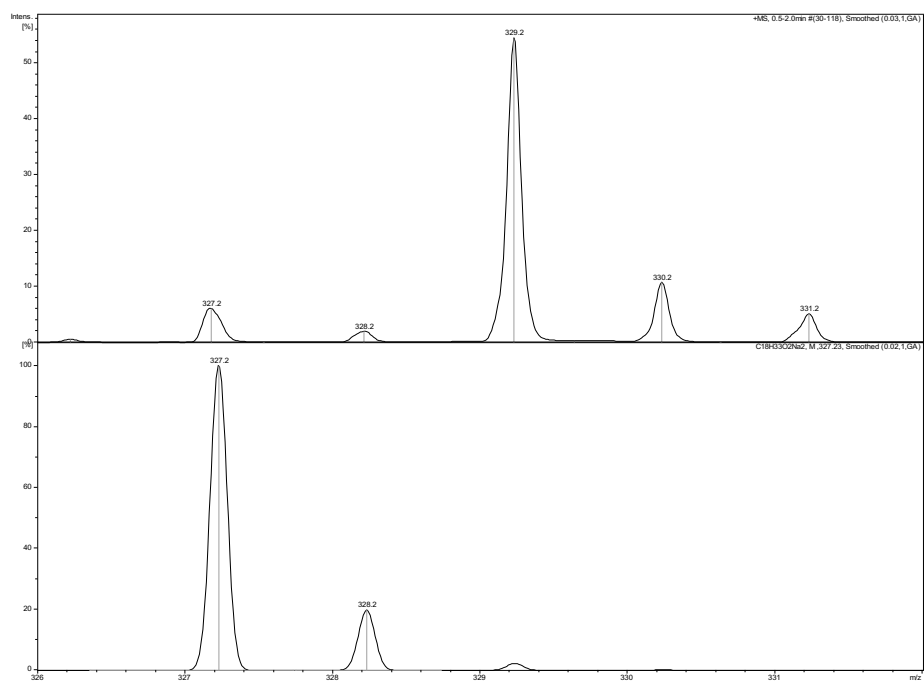

**Figure S49:** ESI-MS of hydrolysis product from guest **6** (top) in H<sub>2</sub><sup>18</sup>O and theoretical calculations of normal acid **6** (below).

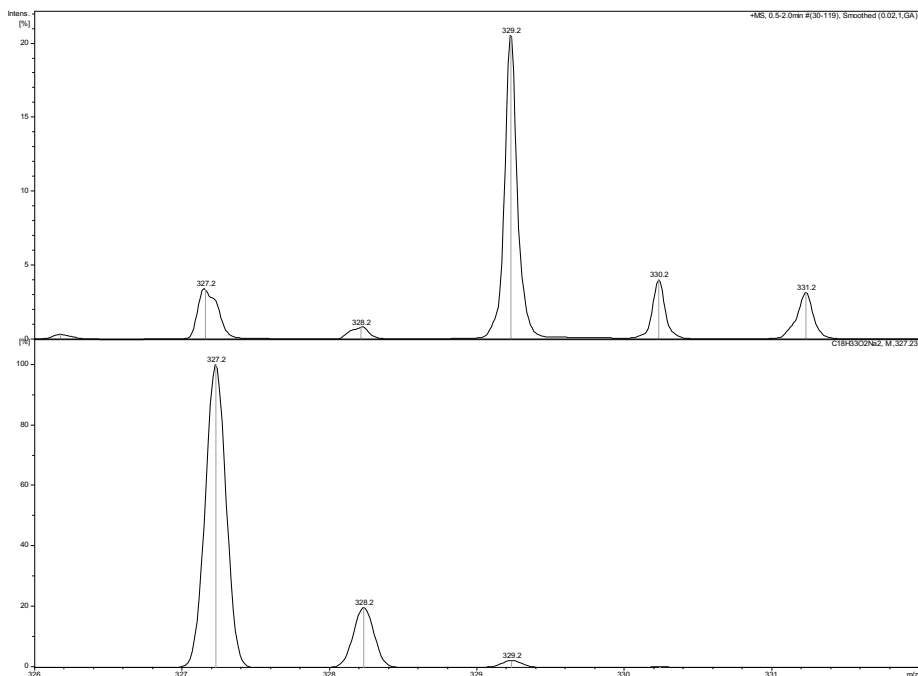

**Figure S50:** ESI-MS of hydrolysis product from guest **7** (top) in  $\text{H}_2^{18}\text{O}$  and theoretical calculations of normal acid **7** (below).

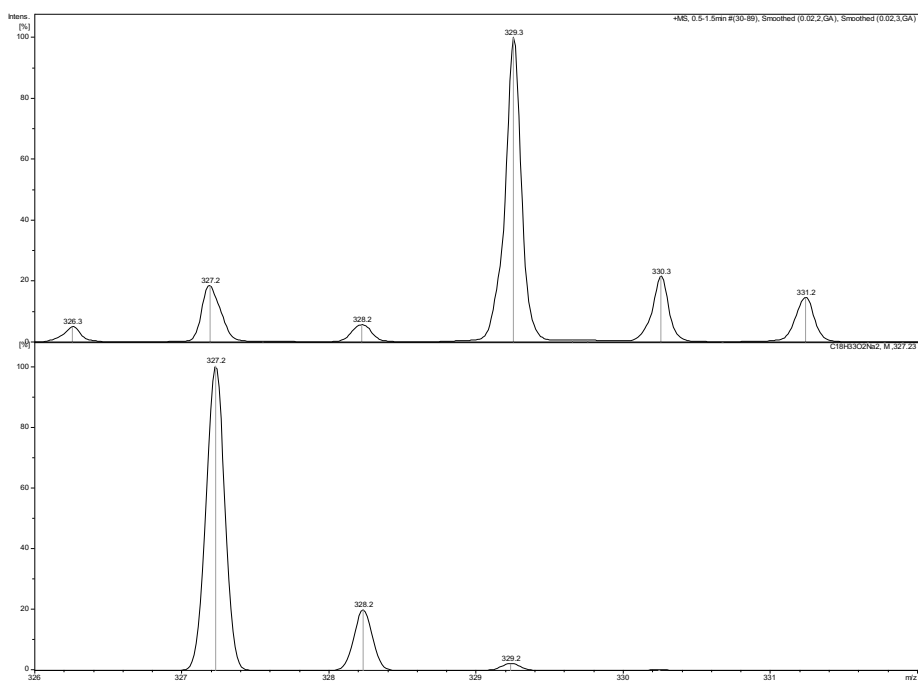

**Figure S51:** ESI-MS of hydrolysis product from guest **8** (top) in  $\text{H}_2^{18}\text{O}$  and theoretical calculations of normal acid **8** (below).

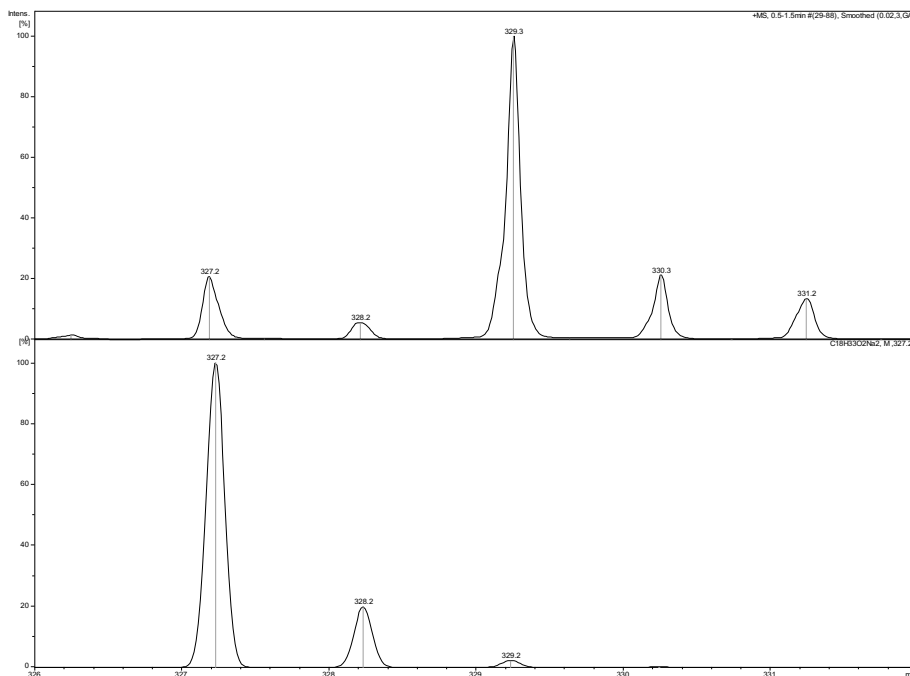

**Figure S52:** ESI-MS of hydrolysis product from guest **11** (top) in H<sub>2</sub><sup>18</sup>O and theoretical calculations of normal acid **11** (below).

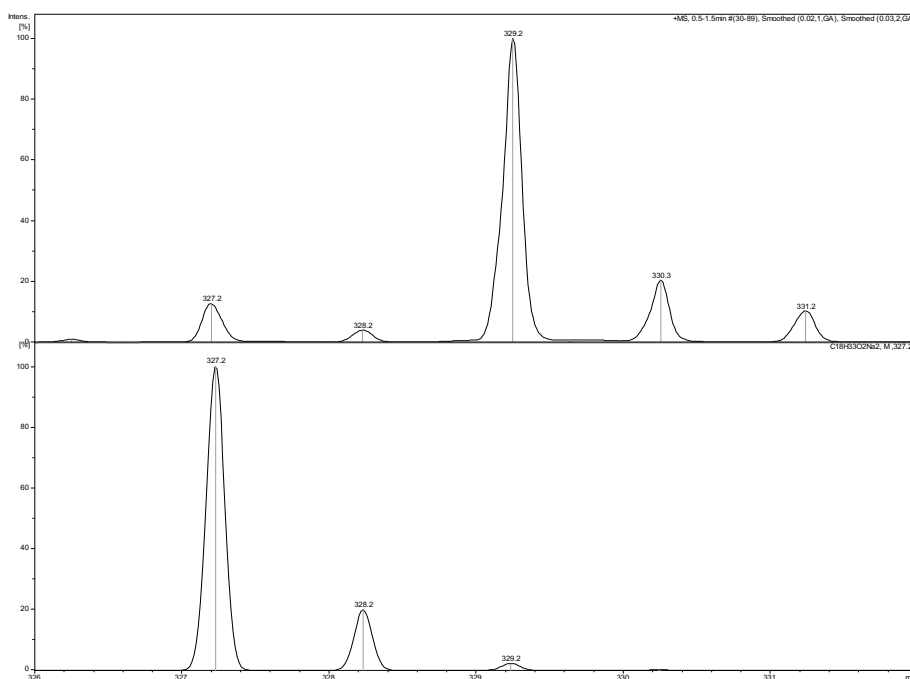

**Figure S53:** ESI-MS of hydrolysis product from guest **12** (top) in H<sub>2</sub><sup>18</sup>O and theoretical calculations of normal acid **12** (below).

## 7 References

1. (a) Liu, S.; Whisenhunt-loup, S. E.; Gibb, C. L.; Gibb, B. C., *Supramol Chem* **2011**, 23 (6), 480-485; (b) Gibb, C. L.; Gibb, B. C., *J Am Chem Soc* **2004**, 126 (37), 11408-9.
2. Wang, K.; Gibb, B. C., *J Org Chem* **2017**.
3. Liu, S.; Gan, H.; Hermann, A. T.; Rick, S. W.; Gibb, B. C., *Nat Chem* **2010**, 2 (10), 847-52.
4. Douglas, J. E.; Campbell, G.; Wigfield, D. C., *Canadian Journal of Chemistry* **1993**, 71 (11), 1841-1844.
